1 **Lords of the flies: Dipteran migrants are diverse, abundant and ecologically important**

2

3 for Biology Reviews

4

5 Will L. Hawkes<sup>1,3§</sup>, Myles H.M. Menz<sup>2</sup>, Karl R. Wotton<sup>1</sup>

6 <sup>1</sup>Centre for Ecology and Conservation, University of Exeter, Cornwall Campus, Penryn,

7 United Kingdom

8 <sup>2</sup>College of Science and Engineering, James Cook University, Townsville, QLD 4811, Australia

9 <sup>3</sup>Swiss Ornithological Institute, Sempach, 6204, Switzerland

10 § [will.leo.hawkes@outlook.com](mailto:will.leo.hawkes@outlook.com)

11

## 12 Abstract

13 Insect migrants are hugely abundant and recent studies have identified Diptera as the major  
14 component of many migratory assemblages, often totalling up to 90% of all individuals.  
15 Despite this, studies into their migratory behaviour have been widely eschewed in favour of  
16 the more 'charismatic' migrant insects such as butterflies, dragonflies, and moths. Here we  
17 review the available literature on Dipteran migration and identify 13 lines of evidence that  
18 we use to determine migratory behaviour. Using this approach, we find species from 60 out  
19 of 130 Dipteran families that show evidence of migration, with Syrphidae fulfilling 12 of  
20 these criteria, followed by the Tephritidae with 10. In contrast to these groups, 22 families  
21 fulfilled just two lines of evidence or fewer, underlining the need for more research into the  
22 migratory characteristics of these groups. In total, 622 species of Diptera were found to  
23 have migratory behaviour (0.5% of the total Dipteran species count), a figure rising to 3% for  
24 the Syrphidae, a percentage mirrored by other animal taxa such as butterflies, noctuid  
25 moths, and bats. Research was biased to locations in Europe (49% of publications) and while  
26 vast regions remain understudied, our review identified major flyways used by Dipteran  
27 migrants across all biogeographic realms. Finally, we detail the ecological and economic  
28 roles of these migrants and review how these services are being affected by anthropogenic  
29 change through population declines and phenological shifts. Overall, this review highlights  
30 how little is known about Dipteran migration and how vital their migratory behaviour may  
31 be to the health of global ecosystems.

32

### 33 Introduction

34 Each year, huge numbers of insects migrate globally to exploit seasonally available resources  
35 to increase their reproductive output, and/or escape habitat deterioration, e.g., due to  
36 temperature change, disease risk, food quality, or to seek overwintering sites (Chapman et  
37 al., 2015; Dingle, 2014; Satterfield et al., 2020). Some insects are known to migrate  
38 hundreds and even thousands of kilometres in a single journey (Hobson et al., 2012),  
39 utilising the sun as a compass and favourable winds to power their journeys (Gao et al.,  
40 2020; Knoblauch et al., 2021; Massy et al., 2021; Menz et al., 2022; Stefanescu et al., 2013).  
41 Studies of insect migration have mainly focussed on the larger, more charismatic insects  
42 (Menz et al., 2022; Stefanescu et al., 2013; Wikelski et al., 2006) or agriculturally important  
43 species (Jia et al., 2022; Jones et al., 2019; Li et al., 2020). Few have systematically analysed  
44 whole migratory assemblages. However, the studies that do exist have revealed a major  
45 group of migrants that remain hugely understudied and that are of great ecological  
46 importance: the Diptera (Hawkes et al., 2022, 2024).

47

48 The Diptera are a huge Order of insects, consisting of over 125,000 described species,  
49 although over 1 million species are estimated to exist (Wiegmann et al., 2011). Dipteran  
50 migration behaviour is poorly known and little studied, despite mass occurrences being  
51 frequently observed, including potentially two of the ten Plagues of Egypt described in the  
52 book of Exodus: gnats and dog-flies (Brenton, 1844). Likewise, in Serbian mythology, a  
53 legend concerning the death of a she-demon called an Ala notes the spring arrival of a  
54 plague of Golubatz (*Simulium colombaschense*) flies from the rotting corpse (Караџић,  
55 2005). This legend too suggests its truth lies within insect migration (Babic et al., 1935).

56 Recent systematic studies of insects passing through migratory hotspots have shown that  
57 the Diptera often comprise nearly 90% of the individuals found in migratory assemblages in  
58 certain locations (Hawkes et al., 2022, 2024). Ecological assessments of these species  
59 suggest that these flies play a huge range of ecological roles of importance to both the  
60 anthropogenic and natural world (Doyle et al., 2020; Hawkes et al., 2022; Wiegmann et al.,  
61 2011). However, when compared to the migration of vertebrates and some other insect  
62 groups (e.g., the Lepidoptera) very little is known and what information there is, is highly  
63 dispersed (Chowdhury et al., 2021; Dingle, 2014).

64

65 In this review we collate all the known information about dipteran migration globally  
66 including which Families and species display migratory behaviour. We use this information  
67 to identify potential flyways, describe the ecological roles of these migrants, and explore the  
68 impacts that anthropogenically induced climate change may have on their migration.

69

## 70 **Defining migration**

71 A widely used definition of migration is one based on behavioural characteristics: 'Migratory  
72 behaviour is persistent and straightened-out movement effected by the animal's own  
73 locomotory exertions or by its active embarkation on a vehicle' (Kennedy, 1985). It depends  
74 on some temporary inhibition of station keeping responses but promotes their eventual  
75 disinhibition and recurrence' (Kennedy, 1985). Dipteran migrants, and migratory insects in  
76 general, are subject to various viewpoints as to what constitutes migration (e.g., butterfly  
77 migration, Chowdhury et al., 2021). Therefore, similarly to the recent butterfly migration  
78 review (Chowdhury et al., 2021), we use the broad behavioural definition of migration

79 quoted above, while recognising that we can only be certain of migratory behaviour from a  
80 few species. Instead of this representing a failure of the definition, we believe it is a result of  
81 a lack of research into the migratory behaviour of Diptera. This broader viewpoint utilised in  
82 this review is hoped to establish an initial baseline for future research into the migratory  
83 behaviour of Diptera.

84

## 85 Literature Search

86 Google Scholar, Web of Science and PubMed were searched to determine which of the  
87 Dipteran families show migratory behaviour based on at least one line of evidence which  
88 suggests some level of migratory behaviour: Seasonal back and forth movement, long  
89 distance flight, seasonally appropriate directed movement, inability to develop in trapped  
90 habitat, ability to choose favourable winds, mass arrival, capable of high-altitude flight,  
91 populations with a high rate of gene flow, strong flight capabilities (tethered flight mill),  
92 orientation within a flight simulator, Physiological/morphological changes in the migratory  
93 phenotype, seasonal appearance of a disease, unable to overwinter (in any state) in location  
94 (see Table 1).

95 Table 1. Migratory criteria. Criteria 1-4 form the 'core 4' most often reported migratory  
96 characteristics.

| Migratory criteria                   | Description                                                                                                                                                                                                                                                                                                                               | Example references  |
|--------------------------------------|-------------------------------------------------------------------------------------------------------------------------------------------------------------------------------------------------------------------------------------------------------------------------------------------------------------------------------------------|---------------------|
| (1) Seasonal back and forth movement | Perhaps the strongest indicator of migration, the insects are observed during the springtime and then again in the autumn season. This can be evidenced by peaks in numbers in different migratory seasons (through radar data/citizen science recording etc.) or actively seeing the insects moving purposefully in one direction during | Florio et al., 2020 |

|                                                                     |                                                                                                                                                                                                                                 |                          |
|---------------------------------------------------------------------|---------------------------------------------------------------------------------------------------------------------------------------------------------------------------------------------------------------------------------|--------------------------|
|                                                                     | one season, and then back the opposite direction later in the year.                                                                                                                                                             |                          |
| (2) Long-distance flight                                            | Long-distance flight is important for migratory insects to escape unfavourable habitats.                                                                                                                                        | Hawkes et al., 2022      |
| (3) Seasonally appropriate directed movement                        | Directed movement of an insect in a seasonally appropriate direction (e.g. higher latitudes in spring, lower latitudes in autumn) suggests a preferred flight detection.                                                        | Lack & Lack, 1951        |
| (4) Inability to develop in trapped habitat                         | Larvae are incapable of developing due to unfavourable seasonal climate. This suggests that the adult insects must move away from their current location to lay their eggs in order for their young to survive.                 | Ashmole et al., 1983     |
| (5) Ability to choose favourable winds                              | An important factor in insect migration as the winds are used to power their migrations.                                                                                                                                        | Gao et al., 2020         |
| (6) Mass arrival                                                    | Migratory flies often arrive in large numbers at the same time.                                                                                                                                                                 | Hawkes et al., 2024      |
| (7) Capable of high-altitude flight                                 | To migrate, flies will take advantage of higher altitude wind currents. Additionally, there is little reason for insects to be found consistently at altitude if they are not attempting to move larger distances.              | Chapman et al., 2004     |
| (8) Populations with a high rate of gene flow                       | This suggests a high level of movement between populations by individuals.                                                                                                                                                      | Mignotte et al., 2021    |
| (9) Strong flight capabilities (tethered flight mill)               | To migrate long-distances, insects must have strong flight capabilities. This can be evidence by their performance in a flight mill.                                                                                            | Nilssen & Anderson, 1995 |
| (10) Orientation within a flight simulator                          | A preferred, seasonally advantageous flight direction in a flight simulator is indicative of migratory behaviour.                                                                                                               | Massy et al., 2021       |
| (11) Physiological/morphological changes in the migratory phenotype | This includes any physiological or morphological changes associated with a migratory phenotype. Including delaying the development of reproductive organs, or changes in morphology between resident and migratory generations. | Doyle et al., 2023       |

|                                                      |                                                                                                                                                                         |                        |
|------------------------------------------------------|-------------------------------------------------------------------------------------------------------------------------------------------------------------------------|------------------------|
| (12) Seasonal appearance of a disease                | If the insects are associated with a seasonal appearance of a disease, then it is likely that they are acting as vectors - bringing the disease from faraway locations. | Nabeshima et al., 2009 |
| (13) Unable to overwinter (in any state) in location | The adult insects were trapped in a region where they are not capable of surviving the winter (e.g., at high latitudes, above oceans, in high mountain passes etc.).    | Ashmole et al., 1983   |

97

98

99 To obtain an initial overview, performed up to March 2024, the search results were filtered  
100 to include the words 'Diptera' and 'Migration' anywhere in the manuscript, without 'larvae'  
101 and 'cell' and 'development' to exclude evolutionary development studies. 'Dispersal' was  
102 also avoided as this swamped the literature with papers documenting small scale  
103 movements of Diptera (~<300m). This methodology yielded 6200 results and the first 1000  
104 papers were carefully analysed for relevancy. A provisional list of migratory Dipteran  
105 families ('X') was obtained from these papers before Google Scholar was then used to  
106 search for specific information on each of these families using the term 'X migration'. In  
107 Web of Science, the search term 'Diptera Migration' without the term 'cell' yielded 700  
108 results. In PubMed the same search criteria returned 993 results. A specific search of  
109 Dipteran families was also carried out for both Web of Science and PubMed databases. To  
110 collect results that may not be included in online search databases due to age, further  
111 searches were performed within books such as 'Mechanisms of Insect Dispersal: Migration  
112 and Dispersal of Insects by Flight' (Johnson 1969), 'Insect Migration' (Williams, 1958) and in  
113 the reference lists of relevant articles. Ultimately, suggestions that saturation was close to  
114 being reached occurred when repeated and irrelevant works were found during literature

115 searches of Google Scholar, Web of Science, and PubMed. Searches were conducted up to  
116 October 2022 and in total 193 relevant articles were identified.

117

## 118 Prevalence of migration

119 In total, we found that ~47% of all Dipteran families (60/130) had evidence of migratory  
120 behaviour from at least one species. A detailed table of evidence including the papers used  
121 can be found in the supplementary file Table S1. Of the 193 papers that contained evidence  
122 of Dipteran migration, 93 (or 48%) provided evidence of Syrphidae (hoverflies) migration,  
123 making them the most well-studied of the migratory Dipteran families. The Syrphidae also  
124 fulfilled the most migratory criteria of any Family: 12/13 criteria (Table 1, Figure 1, and Table  
125 S1) missing only the 'seasonal appearance of a disease' criteria. The Culicidae (mosquitoes)  
126 were the second most studied with 32 (or 17%) of the papers and fulfilled the third most  
127 migratory criteria behind the Tephritidae (fruit flies) with 10/13, and alongside Muscidae  
128 (house flies), and Calliphoridae (blow flies and screw worms) and Chloropidae (grass flies):  
129 9/13 (Figure 1). Chloropidae are miniscule creatures (~2mm in length) yet have been  
130 recorded showing a core set referred to here as the 'core four' of 'Seasonal back and forth  
131 movements', 'long-distance flight', 'seasonally adaptive directed movements' and 'inability  
132 to develop in trapped habitat' suggesting strong migratory behaviour. Additionally, a study  
133 in a high-altitude Pyrenean pass showed their ability to choose favourable winds (Hawkes et  
134 al., 2024), while a North American aerial study found individuals flying at over 1,500m in  
135 elevation (Glick, 1939).

136 Drosophilidae (fruit flies), Mycetophilidae (fungus gnats), Anthomyiidae (root maggots),  
137 Phoriidae (scuttle flies) fulfilled 8/13 migratory criteria, all fulfilling the 'core four'. *Delia*



138 *platúra* (Anthomyiidae) have been recorded in their millions numbers migrating from the  
139 Middle East to Cyprus along a northeast trajectory during the springtime, a journey  
140 representing at least 105m of ocean crossing (Hawkes et al., 2022).

141

142 Simuliidae (black flies), Chironomidae (non-biting midges), Sphaeroceridae (small dung  
143 flies), Sciaridae (black fungus gnats), Tipulidae (crane flies) fulfilled 7/13 migratory criteria.  
144 Simuliidae, Chironomidae, and Tipulidae fulfilled the 'core four' criteria, while  
145 Sphaeroceridae and Sciaridae missed 'seasonal back and forth movement' and 'long-  
146 distance movement' respectively. Tipulidae, for example, showed seasonal back and forth  
147 movement at high altitude above Mali, as well as evidence of long-distance flight after being  
148 found on oil rigs in the North Sea (Hardy & Cheng, 1986), or trapped in nets from ships in  
149 the Gulf of Mexico (Keaster et al., 1996). Additionally, Gatter (1977), recorded Tipulidae  
150 utilising favourable winds in large numbers migrating through the mountains of southwest  
151 Germany.

152 Five of the 60 families fulfilled 6/13 migratory criteria; Sepsidae (ant-like scavenger flies),  
153 Ceratopogonidae (biting midges), Dolichopodidae (long-legged flies), Tachinidae (tachinid  
154 flies), and Tabanidae (horse flies). All families bar Ceratopogonidae (missing seasonally  
155 adaptive movement) and Tabanidae (missing seasonal back and forth movement) fulfilled  
156 the 'core four' criteria. Ceratopogonidae flies, like many others, were recorded showcasing  
157 seasonal back and forth movement at high altitude above Mali (Florio et al., 2020). They  
158 have been shown to be capable of long-distance flight by being recorded in the middle of  
159 the Gulf of Mexico where of course none of their larvae could survive (Keaster et al., 1996).

160 Fascinatingly this family has also been shown to be a vector of livestock diseases such as  
161 bluetongue and schmallenberg viruses (Mignotte et al., 2021).

162 Six of the 60 families fulfilled 5/13 migratory criteria. These were the Lauxanidae (Lauxaniid  
163 flies), Cecidomyidae (gall midges), Ulidiidae (picture-winged flies), Ephydriidae (shore flies),  
164 Stratiomyidae (soldierflies), and Scathophagidae (dung flies). Of these six, only Ulidiidae  
165 fulfilled all the 'core four' criteria. They were recorded showing seasonal back and forth  
166 movement above Mali (Florio et al., 2020), been trapped at sea in the Gulf of Mexico  
167 showing long-distance flight in an area where their larvae cannot develop, and seasonally  
168 adaptive directed movement through the Pass of Portachuelo in Venezuela (Beebe, 1951).

169 A further four families filled 4/13 migratory criteria: Milichiidae (jackal flies), Agromyzidae  
170 (leaf-miner flies), Bibionidae (march flies), and Empidae (dance flies). Again, none recorded  
171 the 'core four' criteria yet all recorded being trapped in areas where their larvae could not  
172 develop. Bibionidae, for example, were recorded after a migration fallout in the snowfields  
173 of the Cairngorms (Ashmole et al., 1983). Additionally, Bibionidae have been recorded  
174 moving purposefully through the Pass of Portachuelo, Venezuela, in large numbers. On May  
175 29<sup>th</sup>, 1948, Beebe (1951) noted a *Biblio* sp. moving through the pass accompanied by a  
176 'veritable mist of others'.

177 Pallopteridae (flutter-winged flies), Lonchopteridae (spear winged flies), Micropezidae (stilt-  
178 legged flies), Psychodidae (owl midges), Sarcophagidae (flesh flies), Sciomyzidae (snail killing  
179 flies), Platypezidae (flat-footed flies), and Asteiidae (asteiid flies), were the eight families  
180 which recorded 3/14 migratory criteria. 'Long distance flight', 'incapable of developing in  
181 trapped location', and 'capable of high-altitude flight' were the commonest criteria met

182 with many of the families found in the middle of the Gulf of Mexico (Sparks et al., 1986;  
183 Wolf et al., 1986) and at high altitude above North America by Glick (1939).

184 The largest group contained 12 of the 60 families and fulfilled 2/13 migratory criteria. These  
185 families were Curtonotidae (small dung flies), Diopsidae (stalk-eyed flies), Limoniidae (crane  
186 flies), Lonchaeidae (lance flies), Pipunculidae (big-headed flies), Platystomatidae (signal flies),  
187 Rhiniidae (Rhiniid flies), Asilidae (robber flies), Therevidae (stiletto flies), and Dryomyzidae  
188 (Dryomyzid flies). 'High-altitude' flight was the most common criteria met. Asilidae were  
189 recorded at medium-high altitude above North America (Glick, 1939) and also showed  
190 seasonally appropriate directed movement through the Portachuelo Pass in Venezuela  
191 (Beebe, 1951).

192 Finally, 11 of the 60 families fulfilled just 1/13 migratory criteria. These families were,  
193 Pyrgotidae (picture-winged flies), Rhagionidae (snipe flies), Pollenidae (cluster flies),  
194 Oestridae (warble flies), Scatopsidae (dung midges), Bombyliidae (beeflies), Scenopenidae  
195 (window flies), Heleomyzidae (spiny-winged flies), Chamaemyiidae (Chamaemyid flies), and  
196 Anisopodidae (wood gnats). 'High-altitude flight' was the commonest criteria met, with  
197 Bombyliidae recorded at 60m in the air (Glick, 1939). Finally, Oestridae (bot and warble  
198 flies), also only met one of the criteria: 'strong flight capabilities on a tethered flight mill'  
199 with a singular paper showing that the reindeer warble fly *Hypoderma tarandi* can fly for  
200 31.5 hours, with a longest continual flight of 12 hours (Nilssen & Anderson, 1995). This  
201 behaviour must play a role in the insect's life history, likely for following their host species  
202 reindeer on their own great migrations, but no further supporting evidence currently exists.

203

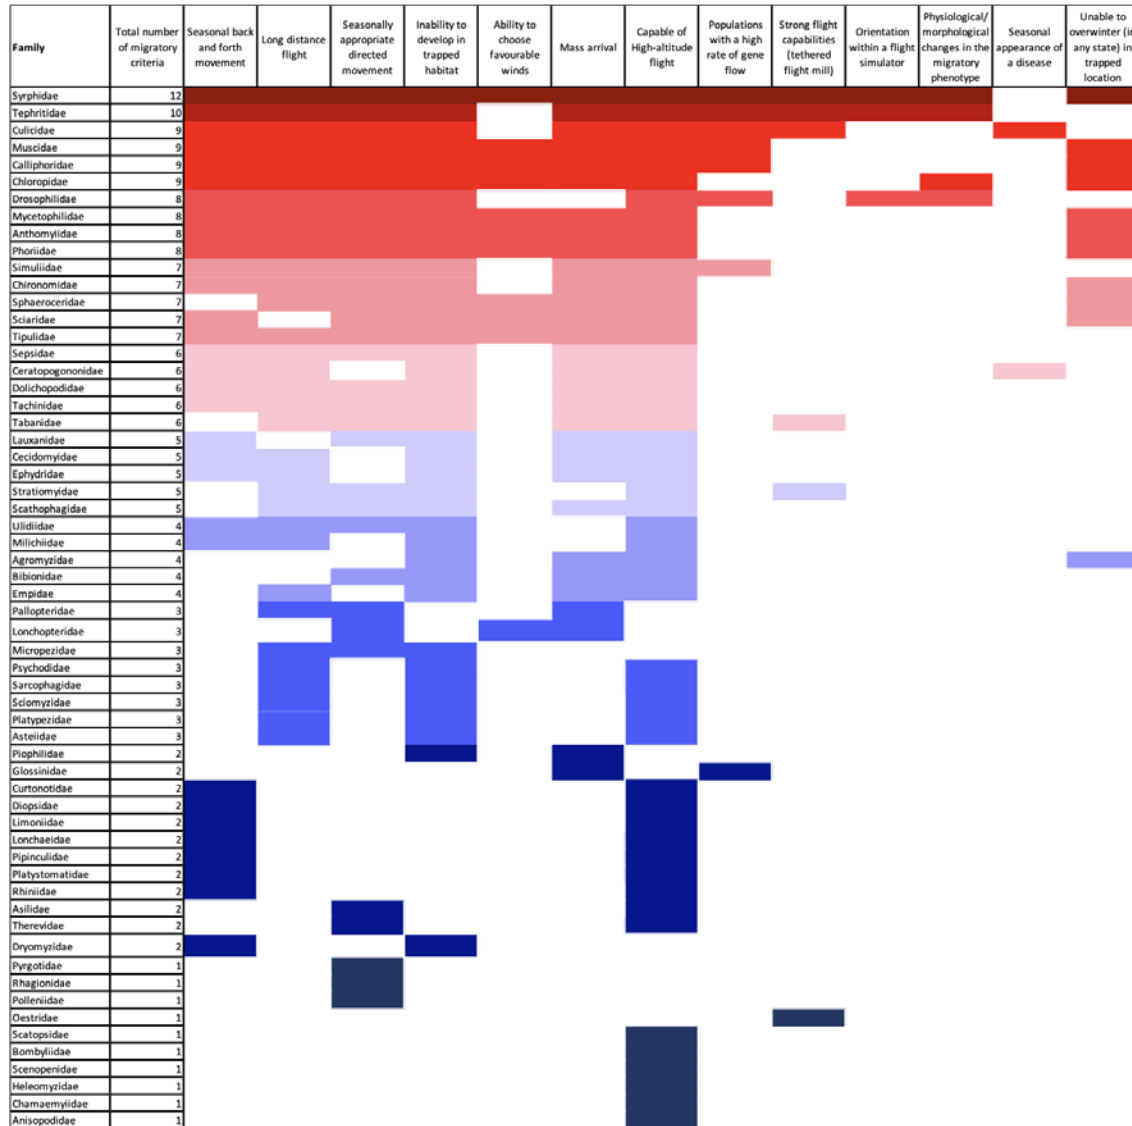

204

205 **Figure 1.** The known migratory criteria fulfilled by the 60 identified migratory families of  
 206 Diptera. Heat map colours indicate the number of migratory criteria identified for each  
 207 family with red being the most (12 criteria fulfilled) and dark blue the least (one criteria  
 208 fulfilled).

209

210 Evidence for migratory was behaviour was found for 622 species (see Supplementary File S1  
 211 for a full species list), making around 0.5% of identified Dipteran species migratory.

212 However, in the Syrphidae, 212 of the known 6000 species migrate, equal to 3.5% of the

213 species in this family (see Figure 2). Interestingly, within the butterflies, a well-studied group

214 of migratory insects, 3% of all species have been diagnosed as migratory (Chowdhury et al.,  
 215 2021) and the same 3% is true for the noctuid moths (Alerstam 2011) and bat species  
 216 (Fleming et al., 2003). While this may suggest an emerging pattern across taxa, more  
 217 research is certainly needed.

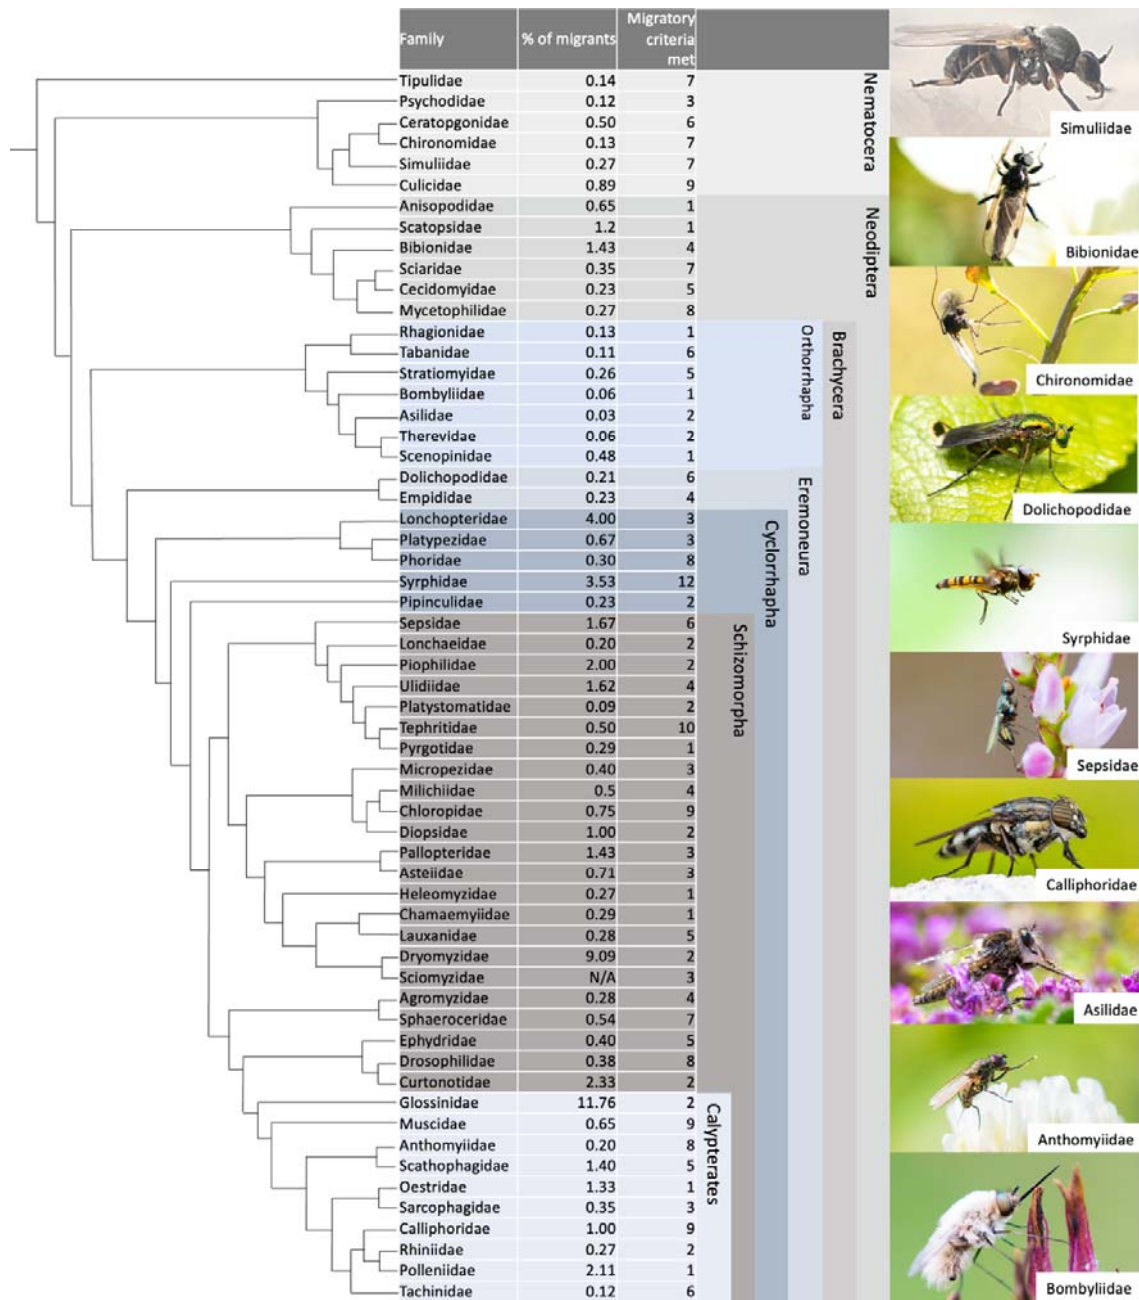

218

219 **Figure 2.** Migratory Diptera phylogeny and percentage of migratory species in each family

220 based on Wiegmann et al., 2011. All photos ©Will Hawkes, apart from Simuliidae

221 (©Mehmet Akif Suna).

222

## 223 **Mechanisms of fly migration**

224 To migrate long distances, flies rely on a variety of mechanisms to both power and orientate

225 themselves on their journeys. Studies performed at migratory hotspots focussing on the

226 migratory criteria needed for fly migration to occur suggest that warmer temperatures, dry

227 conditions, and the presence of winds favourable to the preferred migratory direction are

228 important (Hawkes et al., 2022, 2024 under review). A radar study across southern Britain

229 showed that Syrphidae actively select winds in the autumn which aid southward migration

230 (Gao et al., 2020). During the springtime too, Syrphidae and other Diptera have been

231 recorded arriving at locations in Europe on winds from the south (Gao et al., 2020; Hawkes

232 et al., 2022; Hawkes et al., 2022). Flying higher in favourable tailwinds allows migratory

233 insects to fly faster than their self-powered airspeed (Chapman et al., 2016; Gao et al.,

234 2020). The speed of migratory Syrphidae above southern England have been recorded in the

235 springtime at 11.2 m/s, and 9.8 m/s in the autumn (Gao et al., 2020), only a little slower

236 than the speeds of nocturnal migrating moths (spring: 16.57 m/s, autumn: 13.75 m/s) and

237 songbirds (spring: 13.48 m/s, autumn: 12.14 m/s) (Chapman et al., 2016).

238

239 Because the insects can select favourable winds, this points to the presence of a compass

240 system within the migratory Diptera. In tethered flight simulator experiments, *Drosophila*

241 *melanogaster* have been shown to maintain a constant flight heading utilising the sun and

242 polarised light patterns (Warren et al., 2019; Weir & Dickinson, 2012). However, these  
243 headings are arbitrary with respect to a simulated sun and there is no evidence of time  
244 compensation as the sun moves across the heavens (Warren et al., 2019; Weir & Dickinson,  
245 2012). A flight simulator experiment performed on two species of Syrphidae (*Scaeva pyrastris*  
246 and *S. selenitica*) caught while migrating through the Pyrenees during the autumn, showed  
247 that these larger flies do have a time compensated sun compass enabling them to maintain  
248 their preferred migratory heading even as the sun moves throughout the day (Massy et al.,  
249 2021). The status of such a compass in other migratory Diptera remains to be investigated.

250

251 In addition to using environmental cues, Diptera also undergo changes in their physiology  
252 during migration. These changes allow them to store energy and prepare for the long  
253 journey ahead. For example, flies will increase their fat stores before migrating, which  
254 provides them with the energy they need to fly long distances (Hondelmann & Poehling,  
255 2007). A study into the genomes of non-migratory summer individuals and migratory  
256 autumn individuals trapped in a high-altitude Pyrenean pass, revealed over 1500 genes  
257 showing strong evidence for differential expression between the generations (Doyle et al.,  
258 2022). Analyses of these genes reveal a remarkable range of roles in metabolism, muscle  
259 structure and function, hormonal regulation, immunity, stress resistance, flight and feeding  
260 behaviour, longevity, reproductive diapause, and sensory perception, all of which are key  
261 traits associated with migration and migratory behaviour (Doyle et al., 2022).

262

## 263 Global distribution and Flyways

264 We found a globally widespread distribution of migratory behaviour in Diptera (Figure 3).  
265 Records were recovered from all continents including, surprisingly Antarctica, where the  
266 Calliphorid *Calliphora croceipalpis*, was identified as likely migrant on the sub-Antarctic  
267 Marion Island, 1700km away from South Africa, the closest non-snow-covered landmass  
268 (Chown K, 1994). Our data points to a bias of European migration records, which make up  
269 49% of publications (Figure 3), followed by Asia (13%), North America, Africa, and  
270 Australasia (all 10%). These distributions point to important flyways which we discuss in the  
271 next sections.

272

## 273 Eastern and Western seaboard flyways of North America

274 On the western seaboard of North America, southward migration of Diptera during the  
275 Autumn season was recorded multiple times between 1915 and 1926 (Shannon, 1926).  
276 Species listed were Calliphoridae: *Cochlyomia macellaria*, *Calliphora vicina*, *Phormia regina*;  
277 Muscidae: *Stomoxys calcitrans*, and Syrphidae: *Eristalis tenax*, moving south “in their  
278 thousands” (Shannon, 1926). No further observations being made in the 90+ years since,  
279 and the status of these movements is currently unknown (Menz, Brown, et al., 2019).  
280 However, recent isotopic studies on the Syrphid *Eupeodes americana* suggest that these  
281 flies are capable of moving up to 3000 km from Canada to Alabama, indicating that the  
282 flyway down the eastern part of North America is long distance and may still be well-utilised  
283 by migratory Diptera (Clem et al., 2023) along with other migratory insects (Howard & Davis,  
284 2009; Wikelski et al., 2006). In contrast, only one movement has been identified on the  
285 western seaboard, a northward movement of presumed *Eupeodes* sp. Syrphidae numbering



286 in the hundreds of thousands in just half an hour, recorded on the west coast of California in  
287 April 2017 (Menz, Brown, et al., 2019). Although no further observations exist, it is likely  
288 that migratory Diptera regularly move north in the springtime and southwards in the  
289 autumn to exploit seasonal resources in North America. Citizen science data for the  
290 *Eupeodes* genus suggests that these flies move from 35° N latitude during the winter  
291 months to 65° N during the springtime, suggesting seasonal long-distance movement along  
292 this flyway (Menz, Brown, et al., 2019).

293

#### 294 Cross Caribbean flyway

295 Many Nearctic bird species are known to migrate to the neotropical regions of South  
296 America to overwinter (Sainz-Borgo et al., 2020). Alongside many North American migratory  
297 birds, vast quantities of migratory insects have been recorded flying south in the Autumn  
298 through the Pass of Portachuelo, Venezuela (Beebe, 1951). This pass runs N/S and opens  
299 towards the Caribbean Sea, collecting any insects flying across the ocean. In the late 1940s,  
300 insect migration was so plentiful through the pass that the researchers had to wear glasses  
301 to protect their eyes from the abundant swarms (Beebe, 1951). In this pass, 17 families of  
302 Diptera were recorded, all moving North to South (Beebe, 1951). Although no insect related  
303 studies have occurred in the pass of Portachuelo since, more recent studies have recorded a  
304 variety of migratory Diptera (26 families) alighting on ships and oil rigs in the centre of the  
305 Gulf of Mexico, indicating that Diptera migration likely occurs across the entirety of the  
306 Caribbean Sea (Keaster et al., 1996; A. N. Sparks et al., 1986).

307

## 308 Western European flyway

309 The Western European flyway is perhaps the best studied of all the flyways of migratory  
310 Diptera, although it is telling that the flyway is still hugely understudied. Long-term, whole  
311 assemblage, studies have been performed on migratory Diptera from this region from  
312 suction traps in the UK, to mountain hotspot studies in Germany, the French/Swiss Alps, the  
313 Pyrenees, and the Czech Republic (Aubert et al., 1976; Chapman et al., 2004; Gatter et al.,  
314 2020; Hlaváček et al., 2022; Lack & Lack, 1951; Snow & Ross, 1952; Williams et al., 1956,  
315 Hawkes et al. 2024), and there have been many observations of migratory Diptera made  
316 from locations in the far north such as Norway and within the North Sea, as well as south to  
317 the tip of Gibraltar (Ebejer & Bensusan, 2010; Hardy & Cheng, 1986; Jensen, 2001; Nielsen  
318 et al., 2010). A four-year study at a Pyrenean mountain pass in the autumn season revealed  
319 12 families of migratory Diptera migrating south (Hawkes et al., 2024). Radar studies have  
320 revealed the directional movements of migratory Diptera, detailing a SSW bias in their  
321 autumnal movements (Chapman et al., 2010; Gao et al., 2020; Odermatt et al., 2017). This  
322 suggests that migratory Diptera found in Western Europe in the Autumn will be funnelled  
323 down into the Iberian Peninsula from large swathes of Europe, before potentially crossing  
324 into northern Africa via the straits of Gibraltar (Ebejer & Bensusan, 2010).

325

326 The majority of Dipteran migration studies have been performed in the autumn, but hints at  
327 their springtime routes are available. Large numbers of migratory Syrphidae have been  
328 found in the dunes during the springtime at Gibraltar, having just crossed the straits from  
329 Africa (Ebejer & Bensusan, 2010). In 2022, large numbers of migratory Diptera, primarily  
330 Syrphidae, were found washed up on a beach in SW France, wind analyses suggesting they

331 were moving north over the Mediterranean before drowning due to a storm (Fisler &  
332 Marcacci, 2022). In the same year, large numbers of multiple species of Syrphidae were  
333 found to have arrived on the Isles of Scilly, UK, wind analysis suggesting that they took off  
334 over 200 km away in western France (Hawkes et al., 2022). *Culicoides obsoletus*  
335 (Ceratopogonidae) fly populations, which spread bluetongue and Schmallenberg viruses,  
336 were found to have high levels of gene flow and no genetic structuring at the scale of France  
337 during the springtime, suggesting movement during this period (Mignotte et al., 2021).  
338 Further illumination of the routes may come from ambitious studies such as MoveInEurope  
339 which has a series of radars across the whole of Western Europe, as well as further  
340 monitoring of the routes birds take to understand if they are migrating along with the  
341 insects to ensure a food source during the journey (Haest, 2024). The routes used by insects  
342 and birds in northern Africa may well be linked to those of Western and Eastern Europe.

343

#### 344 [Eastern European flyway](#)

345 The best evidence for the Eastern flyway of Europe is from springtime studies of millions of  
346 Diptera (15 families) moving from the Middle East to Cyprus over at least 105 km of ocean  
347 (Hawkes et al., 2022). Many bird species have been found to use this route too, a large  
348 amount migrating from Eastern Africa before following the Middle Eastern coast (Pedersen  
349 et al., 2019). It is expected that at least some of the insects are doing the same thing. The  
350 linking of the fertile regions of the Middle East by migratory Diptera in the springtime likely  
351 has major importance to eastern European countries in terms of nutrient and pollen  
352 transfer (Doyle et al., 2020; Hawkes et al., 2022; Satterfield et al., 2020). During the Autumn  
353 season many migratory birds are known to utilise the Georgian corridor to migrate

354 southwards (Verhelst et al., 2011). The Georgian corridor area is difficult to study in terms of  
355 Dipteran movements as there is little channelling to ensure the flies move low enough to be  
356 counted from ground level, but often insect flyways mirror those of the birds suggesting it is  
357 a location worthy of further study.

358

### 359 **Himalayan flyway**

360 The areas north of India and the Himalayas such as Siberia, Mongolia, western China, and  
361 Kazakhstan are extensively fertile, but only seasonally during the summer months (Shpedt  
362 et al., 2019). Therefore, these are locations migratory Diptera can use to exploit seasonal  
363 resources before returning to the fertile lands of the Indian subcontinent during the winter  
364 months. Isotopic studies from dragonflies captured in the Maldives suggest that their origins  
365 were from southern Siberia, suggesting huge distances are covered by migratory insects  
366 using this flyway (Hobson et al., 2012). The great geographic barrier of the Himalayas  
367 creates migratory hotspots as the Diptera are directed through mountain passes because of  
368 the winds and topography. Therefore, identification of these mountain pass hotspots will  
369 allow for easier monitoring of migratory behaviour. A few have been identified but not  
370 systematically sampled, providing only tempting morsels of evidence of a long-distance  
371 movement of migratory Diptera. *Episyrphus balteatus* Syrphidae were recorded flying  
372 through a Nepalese pass at 3700 metres altitude, while various Syrphidae have been seen  
373 migrating through the Thorong La pass at 5416 metres altitude (Gatter, 1980; Westmacott &  
374 Williams, 1954). However, while only a handful of studies on migratory Diptera exist in this  
375 area, it is expected to be a highly fertile area for future study.

376

377 African movements

378 Due to the size and considerable variety of habitats within the African continent, there are  
379 thought to be a great deal of Dipteran migration routes however little is known about them.  
380 The great discovery waiting to be made lies within the Northern half of the continent. A  
381 recent study based on the normalised difference vegetation index (NDVI) has shown that  
382 most suitable habitat for European-summering painted lady butterflies (*Vanessa cardui*) to  
383 overwinter is within the sub-Saharan Sahel region (Hu et al., 2021) while field data and  
384 ecological niche modelling indicates the Afrotropical region (Talavera et al., 2023).  
385 Migratory Syrphidae have been found crossing the Straits of Gibraltar during the springtime  
386 suggesting that insects from Africa do recolonise the Europe on their return migration  
387 (Ebejer & Bensusan, 2010). NDVI analysis in the Middle East suggested that the numbers of  
388 migratory Diptera, like the painted lady butterflies, are also correlated with increased  
389 vegetation growth (Hawkes et al., 2022). Therefore, if the Diptera are indeed like the  
390 butterflies, they too may be crossing the Sahara to the more favourable Sahel regions.  
391 While, to the best of our knowledge, no direct evidence is available for migratory Diptera  
392 moving this far, the Bedouin people living at the Bawiti oasis area of Egypt see large  
393 numbers of migratory flies moving south in the autumn and north in the spring each year  
394 (Mohammed Khozam, *Pers. Comm.*). South of this area, the Saharan desert continues until  
395 the Sahel region of Sudan (the next suitable overwintering habitat for these insects). We  
396 suggest that European Dipteran migrants may indeed continue across the Sahara on their  
397 spring and autumn migrations, making their journeys even more remarkable, but this  
398 requires confirmation.

399

400 In West Africa in Mali, a total of 28 families of Diptera including Anthomyiidae and  
401 Calliphoridae have been recorded making seasonal back and forth movements at altitudes  
402 from 40-290m (Florio et al., 2020). Some of these species are likely long-distance migrants  
403 that crossed the Sahara, but as the study was primarily nocturnal (aerial traps were opened  
404 from 1700-0730) it is possible that many diurnal Dipteran migrants were missed. Other  
405 migration routes in Africa include the annual arrival of Simuliidae flies to the Volta River  
406 basin in West Africa from distant source areas with the onset of the migration season  
407 (Garms et al., 1979). Wind patterns also move large quantities of mosquitoes around West  
408 Africa, with the West African monsoon winds enabling large numbers of Dipteran migrants  
409 to exploit the seasonal resources created by the monsoon rains (Dao et al., 2014; Huestis et  
410 al., 2019; Parker et al., 2005).

411

412 Eastern and southern Africa have even fewer studies than west Africa. However, there is  
413 some evidence of Dipteran migrants (Glossinidae) arriving with the rains from long distances  
414 in Kenya (Brightwell et al., 1997). This suggests that flies here too are utilising the regular  
415 seasonal patterns of monsoon winds to migrate, it is likely that far more yet-to-be-  
416 discovered taxa are also using these meteorological conditions to exploit seasonal resources  
417 in the region (Funk et al., 2016). Africa is an understudied region in terms of Dipteran  
418 migration, but there is little doubt there are many migration routes to be discovered.

419

## 420 East Asia to SE Asia

421 Long term studies on Beihuang, a small, isolated island in the Bohai Strait, NE China that  
422 included trapping, trajectory analysis, and intrinsic markers, revealed that *Episyrphus*

423 *balteatus* (Syrphidae) exhibit seasonal back and forth latitudinal movement, passing the  
424 island each year on long-distance migration (Jia et al., 2022). Population genetic studies  
425 have also revealed that *Eupeodes corollae* (Syrphidae) has little differentiation in its  
426 population across the whole of China, suggesting regular long-distance movement to  
427 maintain geneflow across the whole geographic area (Liu et al., 2019). Migration to the  
428 Japanese islands from the Asian mainland may also be regularly occurring. Reports have  
429 been made of groups of *Calliphora nigribarbis* (Calliphoridae) flies arriving to southern Japan  
430 from the Korean peninsula, some 300 km to the NW during the Autumn migration season  
431 (Kurahashi, 1997). Based on phylogenetic analysis of Japanese Encephalitis Virus (JEV)  
432 strains found in Japan, it has been determined that at least some of the strains originate in  
433 Vietnam and China's inland region, while others originated in Shanghai, China (Nabeshima  
434 et al., 2009). It has been suggested that the mosquito vectors of the disease migrate to the  
435 area regularly, brought from SE Asia by a seasonal low level jet stream during the rainy  
436 season (which also brings the brown leafhopper (*Laodelphax striatellus* - Hemiptera) to  
437 Japan) and on westerly winds from mainland China (Nabeshima et al., 2009).

438

## 439 Oceania

440 Like many areas, Australian migratory Diptera are poorly studied. A flyway of various species  
441 seems to exist between SE Asia and Northern Australia, especially between Papua New  
442 Guinea and Queensland across the Torres Strait. Mosquitoes are thought to enable the  
443 regular occurrence of Japanese Encephalitis Virus into Australia from Papua New Guinea,  
444 utilising favourable winds (Ritchie & Rochester, 2001). Similar movements are known by the  
445 *Culicoides* sp. (Ceratopogonidae) as vectors of diseases including Blue Tongue between

446 Indonesia, Papua New Guinea and Queensland (Eagles et al., 2014). Additionally,  
447 movements of *Melangyna* sp. (Syrphidae) have been recorded across the Bass Strait  
448 between Tasmania and mainland Australia during the springtime (Hill, 2013), although given  
449 the size and climatic variability of the Australian continent, these SE Asia-Australian and  
450 Australian-Tasmanian flyways are unlikely to be linked. A citizen science study based on  
451 Syrphidae in Australia showed that there were major latitudinal movements throughout the  
452 year in four species (*Melangyna viridiceps*, *Simosyrphus grandicornis*, *Eristalinus*  
453 *punctulatus*, and *Eristalis tenax*), a behaviour suggestive of migration (Finch & Cook, 2020)  
454 however, further work is needed in Australia to reveal the true geographical range of  
455 movements of migratory Diptera. *Eristalis tenax* is a cosmopolitan species and appears in  
456 migration studies from Europe and North America and is found in Australia and New  
457 Zealand, this is also the case for *Episyrphus balteatus* in Europe and East Asia (Finch & Cook,  
458 2020; Hawkes et al., 2022; Jia et al., 2022; Shannon, 1926). The cosmopolitan distribution of  
459 these migrants could allow for fascinating studies into the behaviour and genomics of the  
460 same species across multiple continents.

461

## 462 Potential flyways

463 Vast swathes of the globe are understudied in terms of migratory Diptera and there are  
464 undoubtedly more species and flyways to be discovered (as evident from the map in Figure  
465 3). No records of Dipteran migration have been found from sub-equatorial South America.  
466 Given that the vast latitudinal difference covered by the landmass will give rise to many  
467 seasonal resources to exploit, conditions seem perfect for the presence of migratory  
468 Diptera. Similarly, southern Africa is understudied yet has great potential for discovery. One



469 method for discovering new migratory flyways of Diptera is monitoring the routes of  
470 migratory birds or the systematic monitoring of insects at likely visible migration points in  
471 the landscape. For example, migratory globe-skimmer dragonflies (*Pantala flavescens*)  
472 migrate between India and Africa on monsoon winds (R. C. Anderson, 2009) and so smaller  
473 Dipteran species may also be traversing the same immense distance to exploit the  
474 seasonally available conditions created by the monsoons. Genetic studies have revealed  
475 that species of Drosophilidae and Tephritidae found in East Africa have their origins in India,  
476 likely having been blown across on the seasonal winds (Jacquard et al., 2013; Tsacas, 1984).  
477 Additionally, large numbers of *Chrysomya megacephala* (Calliphoridae) were recorded  
478 arriving to a Maldivian island suggesting a similar journey to the *Pantala flavescens*  
479 dragonflies (WLH pers. obs.). Thrillingly, also on the Maldives, parasitic *Forcipomyia* midges  
480 were recorded clinging to the wings of migratory *Pantala flavescens* dragonflies which had  
481 presumably just arrived from India (WLH pers. obs), an example of phoretic migration by  
482 these dragon-riding flies.

483 These tidbits of information on migratory Diptera in this area suggest an important research  
484 field for future studies.

485

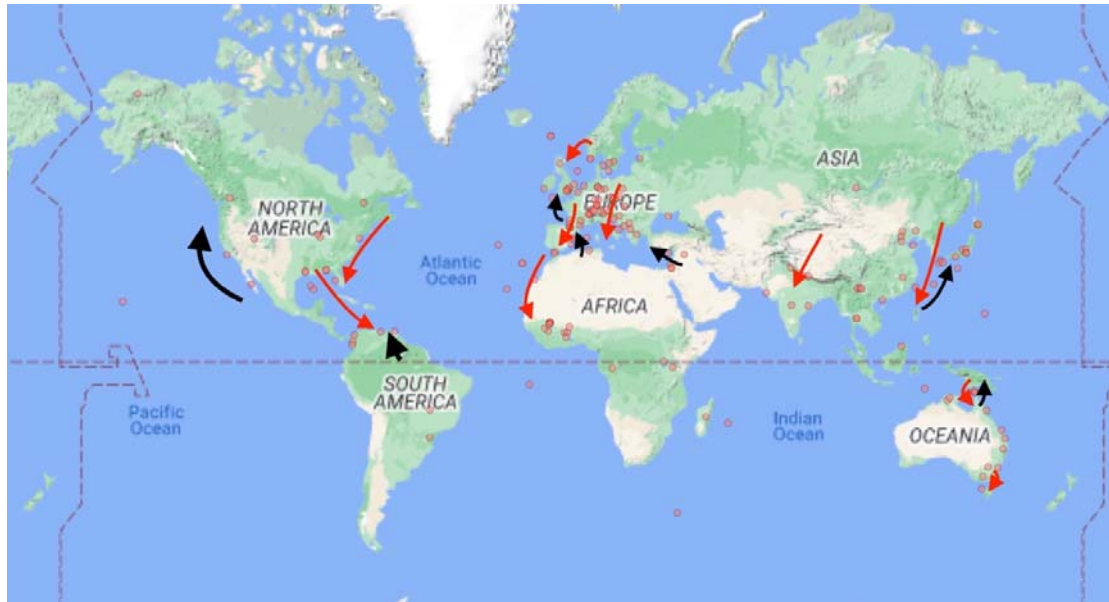

486

487 **Figure 3.** The geographic distributions of Dipteran migration studies and migratory flyways.

488 Black arrows represent suggested northward migration routes, Red arrows represent

489 southward routes. Red dots represent the locations of the Dipteran migration studies

490 identified here.

491

### 492 Ecological Roles

493 We identified a diverse range of Diptera migrants, and they play an equally diverse range of

494 ecological roles. Analysis of the 622 identified species (which often had multiple ecological

495 roles) revealed that 62% were pollinators, 35% were decomposers, 18% were pests, 16%

496 were disease vectors, 10% controlled the pests, and all played a role in the transfer of

497 nutrients (Figure 4). Understanding the roles these Diptera play is imperative when

498 considering how the planet may be impacted by these movements of flies globally.

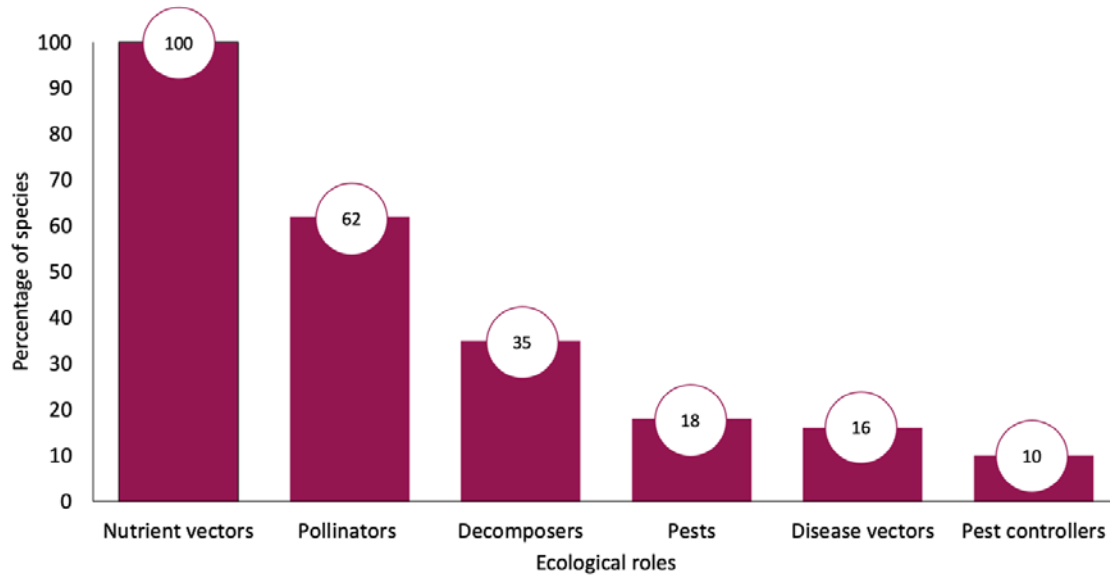

499

500 **Figure 4.** The ecological roles played by the 622 known Dipteran migrants (a single species  
501 often played multiple ecological roles).

502

### 503 Pollinators

504 An estimated 62% of identified Dipteran migrants have been identified as pollinators. Rader  
505 (2020) reviewed non-bee insects as pollinators of crops and found that Diptera visited 72%  
506 of major food crops. Six families of flies visited more than 12 major food crops, Syrphidae,  
507 Calliphoridae, Muscidae, Sarcophagidae, Tachinidae, and Bombyliidae, and all include  
508 species that are known migrants. It was found that amongst these families, the Syrphidae  
509 and the Calliphoridae were the most common visitors (Rader et al., 2020). The Syrphidae  
510 alone have been found to pollinate 52% of major food crop plants globally with an estimate  
511 worth of around US\$300 billion per year (Doyle et al., 2020; Rader et al., 2020).

512

513 Migratory pollinators may be exceptionally important to global ecosystems because, unlike  
514 more sedentary pollinator species, they transport pollen great distances and can link  
515 geographically isolated plant populations (Doyle et al., 2020; Lysenkov, 2009; B. Meyer et  
516 al., 2009; Rader et al., 2011). Evidence for long-distance transfer of pollen was found for  
517 individual *E. tenax* (Syrphidae) and *C. vicina* (Calliphoridae), caught after flying at least 105  
518 km across the eastern Mediterranean from the Middle East to Cyprus with Bug Orchid  
519 (*Anacamptis coriophora*) pollen attached to their faces (Hawkes et al., 2022). Further pollen  
520 analysis by DNA barcoding revealed that these same *E. tenax* flies were carrying at least  
521 seven other species of pollen upon their bodies (Hawkes and T. Doyle *unpublished data*)  
522 while data from migratory *E. balteatus* and *E. corollae* caught in the Alps revealed average  
523 pollen loads of 10.5 grains per fly (range: 0–107) from up to 3 plant species (Wotton et al.  
524 2019). Pollen can remain viable for up to 2 days (Gibernau et al., 2003) and these insects are  
525 capable of moving 100s of km in a matter of hours with wind assistance (Hawkes et al.,  
526 2022) suggesting viable pollen can be transferred great distances.

527

528 In addition, migratory pollinators may be very numerous; just two species of Syrphidae can  
529 transport an estimated 3–8 billion pollen grains into southern Britain from the near  
530 continent each year, and 3–19 billion pollen grains out to the continent in the Autumn  
531 (Wotton et al. 2019). Such movements are likely to have highly significant consequences for  
532 long-range gene flow mediated by insect migration. For example, the movement of pollen  
533 may allow for increased gene flow between populations which in turn may increase the  
534 resistance of the plants to inbreeding depression, increase the likelihood of the plants  
535 surviving and maintain the health of the isolated populations (Luo et al., 2019; Pérez-Bañón

536 et al., 2003). Migratory pollinators may also allow for adaptations by plant populations to  
537 counter a warming climate by spreading alleles favourable for disease resistance or drought  
538 (Luo et al., 2019; Pérez-Bañón et al., 2003). Small islands without the means to support  
539 populations of sedentary pollinators may especially benefit from migratory Dipteran  
540 pollinators. For example, in the Columbretes archipelago of Spain the migratory Syrphid *E.*  
541 *tenax* is known to be the major pollinator species, alongside the Calliphorid *Lucillia sericata*  
542 (Pérez-Bañón et al., 2007).

543

#### 544 **Decomposers**

545 Migratory animals rely on arriving in an area where resources are present upon which their  
546 young can develop (Dingle, 2014). Many species of migratory Diptera are decomposers  
547 (such as some Calliphoridae and Eristaline Syrphidae), taking the organic matter from a dead  
548 organism or an organism's waste and breaking it down into simple organic substances which  
549 can subsequently be taken up by other organisms (Losey & Vaughan, 2006). Studies  
550 performed by Hawkes et al (2022) in Cyprus and the Pyrenees (Hawkes et al., 2024) revealed  
551 that migratory Diptera, whose life histories play a major role in decomposition, comprise a  
552 significant part of the entire migratory assemblage (16% in Cyprus, 33.6% in Pyrenees)  
553 (Hawkes et al., 2022; Hawkes et al., 2024) We calculate here that of all known migrant  
554 Diptera, those who play a role in decomposition comprise 35%.

555

556 Many of the migrant decomposers feed on decaying plant or fungi matter or animal waste.  
557 Migratory Calliphoridae such as *L. sericata* (Diakova et al., 2018) and the *C. vicina* group lay  
558 their eggs on carrion for their offspring to develop upon (G. S. Anderson, 2011). These

559 carrion feeders are known to fly great distances (Hawkes et al., 2022) and some of their  
560 populations are considered panmictic, suggesting high levels of migration (Diakova et al.,  
561 2018), therefore the nutrients taken from the larvae feeding on carrion are redistributed  
562 across large areas through nutrient transfer. The Syrphidae within the Subfamily Eristalinae  
563 are important examples of this. *Eristalis tenax* larvae are coprophagous, saprophagous and  
564 aquatic filter feeders which prefer to live in areas with high microbial and organic  
565 contamination (Francuski et al., 2014). They therefore aid the biodegradation of organic  
566 waste, especially within synanthropic conditions (in association with and benefitting from  
567 human activities) (Francuski et al., 2014). In ideal conditions, it has been found that just  
568 8,800 *E. tenax* eggs (0.8ml) (Čičková et al., 2012) can decompose 100 kg of pig slurry,  
569 transforming it into organic compost with excellent agronomic potential (Ecodiptera, 2009).  
570 This makes this species of Syrphid highly efficient and important decomposers. The impacts  
571 migratory Diptera have on decomposition efforts globally are not known, but given their  
572 abundance in migratory assemblages, the impacts could be large. Strategies involving the  
573 planting of wildflowers and providing other habitats for migratory Diptera near areas where  
574 decomposition is needed (livestock slurry pits for example) could allow the maximisation of  
575 the decompositional roles of migratory Diptera.

576

## 577 Pests

578 The planet has become increasingly agricultural and there are vast swathes of land  
579 dedicated to growing the same types of crop or livestock globally (W. B. Meyer & Turner,  
580 1992). Migratory species need to be able to find resources wherever they choose to settle,  
581 and the species that have evolved to use these abundant crops or livestock as a food source

582 have been the most successful (Guo et al., 2020). Indeed, monocultures of crops have led to  
583 a simplification of the biodiversity of insects, reducing the natural enemies of insects, in turn  
584 creating conditions which are suitable for agricultural pests to flourish (Sánchez-Bayo &  
585 Wyckhuys, 2019). Many migratory Diptera are classed as agricultural pests, we estimate this  
586 number at 18% of all known Dipteran migrants. For example, some migratory species of  
587 Chloropidae, such as *Oscinella frit*, are pests of various cereals, grasses, and spring sown  
588 maize (El-Wakeil & Volkmar, 2011; Southwood & Jepson, 1962). Over 15 million *Delia*  
589 *platura* (Anthomyiidae) were found migrating long distances (minimum 105 km) from the  
590 Middle East to Cyprus in spring 2019, this species is a generalist crop pest of nearly 50 plant  
591 species (Guerra et al., 2017; Hawkes et al., 2022). This was the first instance that this species  
592 had been recorded migrating in such large numbers, suggesting an increase in either the  
593 abundance of this species or the prevalence of its migratory behaviour. Species such as the  
594 stable fly *S. calicitrans* (Muscidae) are known costly pests of livestock (particularly cattle)  
595 (Campbell et al., 2002; Gerry, 2007), the adult flies feeding on the blood of the mammals to  
596 provide a protein source before laying their eggs (Bishopp, 1913). These flies are known to  
597 seasonally recolonise dairy farms (Beresford and Sutcliffe, 2009) and can fly at least 225 km  
598 based on mark release recapture experiments (Hogsette & Ruff, 1985). *Cochliomyia*  
599 *hominivorax* (Calliphoridae) is a well-known migrant that is a major pest of livestock as its  
600 larvae cause myiasis, burrowing into the flesh of the mammal to feed and develop (Costa-  
601 Júnior et al., 2019). Methods for controlling these species often include use of pesticides,  
602 however rates of pesticide resistance in migratory organisms have been found to be high  
603 (Hemingway et al., 1997; M. Raymond & Pasteur, 1996) underlining the need for a greater  
604 understanding of the life histories and movement patterns of these species.

605

## 606 Disease vectors

607 One of the most important impacts that migratory Diptera have is as vectors of disease,  
608 with 16% of identified Dipteran migrants thought to play this role. Of all the migratory  
609 Dipteran families, the mosquitoes (Culicidae) which have been the best studied in this  
610 regard. Mosquitoes are known vectors of diseases and kill over half a million people globally  
611 every year (Bueno-Marí et al., 2022). *Anopheles coluzzii* mosquitoes which are the primary  
612 malaria vector have been shown to engage in windborne migration above Africa, travelling  
613 up to 300km in 9 hours (Huestis et al., 2019). Of other families, the blackfly *Simulium*  
614 *damosum* (Simuliidae) is capable of moving hundreds of kilometres each year on monsoon  
615 winds across west Africa, spreading a nematode (*Onchocerca volvulus*) that causes river  
616 blindness (R. H. A. Baker et al., 1990), and *Culicoides* sp. (Ceratopgonidae) are known to aid  
617 the seasonal recurrence of blue tongue disease in Israel each year (Braverman & Chechik,  
618 1993). Within the Muscidae, the stable fly *S. calcitrans* is thought to be able to transfer  
619 food-associated human pathogens from agricultural to urban areas (Mramba et al., 2007),  
620 as well as directly transmitting wildlife diseases (Mihok & Clausen, 1996). Some migratory  
621 Diptera are involved in the transmission of plant diseases. For example, the bean seed fly *D.*  
622 *platura* (Anthomyiidae) has been recently discovered as a major vector of the soft rot  
623 bacteria (Pasanen, 2020). Another understudied area of research is the role that migratory  
624 Syrphidae may play in the transfer of diseases that affect honeybees (*Apis mellifera*) and  
625 other bee species, such as deformed wing virus to previously unaffected populations  
626 (Fischer et al., 2006). However, although presence of the diseases has been found within the  
627 migratory *E. tenax*, there was no evidence of viral replication within the species or data on  
628 whether the diseases can be actively passed on to the bees (Fischer et al., 2006).

629



630 Mosquito based diseases are generally a major problem within warmer, more tropical, areas  
631 of the globe where the Diptera involved in vectoring these diseases (e.g., mosquitoes,  
632 Tsetse flies, Simuliidae) can occur in abundance (Huestis et al., 2019). However, with global  
633 warming, it is predicted that 4.7 billion more people will be affected by these diseases by  
634 2070 compared to the 1999 numbers (Colón-González et al., 2021). This will be the result of  
635 rising temperatures increasing the suitability of locations for the survival of disease vectors.  
636 The range expansion of these diseases could cause serious problems in areas where the  
637 human population are immunologically naïve, or healthcare systems are unprepared (Colón-  
638 González et al., 2021). The migratory behaviour of these Dipteran vectors increases the  
639 complexity of combatting the diseases as a new influx of migratory pathogens are  
640 introduced each year with the insects' arrival (e.g., Lebl et al., 2015; Riad et al., 2017). This  
641 necessitates the development of management plans which consider the long-distance  
642 movement of the vectors. Unfortunately, many insect vectors of disease are understudied in  
643 terms of their migratory behaviour, yet targeted research on their movement patterns could  
644 have significant impacts for human health.

645

#### 646 **Pest controllers**

647 Many arthropods are pests that cause damage to agricultural crops, and many migratory  
648 Diptera are predators upon these pests at some stage in their life histories (Courtney et al.,  
649 2009). We found that 10% of all migratory Diptera play the role of pest controllers. These  
650 pest controllers include many representatives from the Syrphidae (such as the  
651 aphidophagous *E. balteatus* and *E. corollae* (Wotton et al., 2019)) as well as from the  
652 Calliphoridae (such as *Stomorphina lunata* which feeds upon locust larvae) (Greathead,

653 1962). Tachinidae are also known to be useful pest controllers as they lay eggs in a variety of  
654 insect larvae including those of the Lepidoptera, Coleoptera, Hemiptera, and Symphyta.  
655 For example, the migratory *Tachina fera* (Tachinidae) has been used to control the  
656 populations of the Gypsy moth *Lymantria dispar* in forest environments (Davis, 2013). It is  
657 presumed that most migrant species are generalists or at least target a highly abundant prey  
658 source. As a result of the increased agricultural land coverage, the species that are classed  
659 as pests have generally become more dominant in recent times (Guo et al., 2020). Because  
660 of this, the migratory Diptera that prey on these pests are increasingly important, especially  
661 given the rise of pesticide resistance in populations and the other ecological benefits that  
662 migratory Diptera bring to agricultural landscapes (Doyle et al., 2020; Hemingway et al.,  
663 1997; M. Raymond & Pasteur, 1996).

664

665 Of the migratory Diptera, Syrphidae are best studied regarding pest control (Rojo et al.,  
666 2003). Aphidophagous Syrphidae are common migrants across the world's continents  
667 barring Antarctica, meaning the total impact in terms of pest control by the migratory  
668 Syrphidae is likely to be huge. Many migratory species such as the abundant *E. balteatus*  
669 and *E. corrolae* feed on aphids as larvae and therefore are beneficial to agricultural  
670 practices. Indeed, both species are available commercially as biological control agents for  
671 use in glasshouses (Moerkens et al., 2021; Pineda & Marcos-García, 2008). The larvae of *E.*  
672 *balteatus* and *E. corrolae* are voracious predators and it has been estimated that the  
673 progeny of flies migrating to southern England during the springtime consume up to 10  
674 trillion aphids each year (Wotton et al., 2019). However, the contribution to biological

675 control by migratory Syrphidae is likely to be much greater, as the impact of other  
676 immigrations or generations produced by other migratory species is yet to be calculated.

677

## 678 Nutrient transfer

679 It is thought that insect migration represents the most important animal movement  
680 annually in terrestrial ecosystems, comparable to the most significant of marine migrations  
681 (Hu et al., 2016). As migratory Diptera are multi-generational migrants, when they reach a  
682 suitable area, they lay their eggs and die (Chapman et al., 2015), hence, 100% of these  
683 insects are capable of transporting nutrients between geographically distant ecosystems via  
684 carcass deposition (Hu et al., 2016; Satterfield et al., 2020). The dry body weight of a  
685 migratory fly is typically comprised of 10% Nitrogen and 1% Phosphorous, elements which  
686 are limiting to plant growth (Elser et al., 2000). Therefore, these insects represent a rich  
687 source of nutrient influx for ecosystems. Few studies have documented the influence of  
688 nutrient transfer by migratory insects, and fewer still have focussed on the Diptera alone.  
689 Wotton (Wotton et al., 2019) estimated that the 4 billion *E. balteatus* and *E. corollae*  
690 Syrphidae migrating above southern England each year, comprise 80 tons of biomass and  
691 will deposit 2500kg of Nitrogen and 250kg of Phosphorous a considerable distance from  
692 their source. The entire migratory assemblage moving annually across southern England has  
693 been estimated at 3200 tons, 7.7 times the 415 tons of biomass of migrating songbirds,  
694 highlighting the huge importance of migratory insects to nutrient transfer (Hu et al., 2016).  
695 Migratory Diptera are known to be abundant in migratory assemblages, and by  
696 extrapolating the values calculated for the Syrphidae to all other migrant Diptera moving

697 above southern England and the rest of the world, the movement of nutrients each year is  
698 likely to be immense.

699

700 Far more research is needed into this fascinating field, particularly in high latitude  
701 environments, where very few organisms can survive the winter months and where the  
702 annual, dependable influx of migratory Diptera into these regions may provide vital  
703 nutrients to the continual growth and blooming of vegetation in the area. Animals further  
704 up the trophic level which rely on insects as food, such as birds (Tallamy & Shriver, 2021),  
705 may rely on the influx of migratory Diptera each year during the springtime to provide the  
706 food needed to feed their young. Finally, because migratory Diptera are not aiming for a  
707 specific location on their seasonal migrations, it could be that a large percentage of their  
708 populations regularly end up drowning in the sea. Migrating Diptera are often trapped on  
709 ships far out in the ocean. For example, *Calliphora nigribarbis* and *Aldrichina grahami*  
710 (Calliphoridae) were caught 300-450km off Japan in the Pacific Ocean (Kurahashi, 1991).  
711 While some flies may eventually reach shore, many more likely drown in the ocean due to  
712 exhaustion or inclement weather conditions. In 2022, large numbers of Syrphidae were  
713 found stranded on a beach in southwestern France after being caught in a storm and  
714 drowning (Fisler & Marcacci, 2022). It could be that these perished flies provide additional  
715 nutrients for marine organisms.

716

## 717 Declines in migratory Diptera

718 The natural world is under intense pressure from myriad anthropogenically induced  
719 impacts, and many insect taxa have undergone precipitous declines: A study monitoring

720 flying insect biomass in Germany revealed a 76% decline over just 27 years (Hallmann et al.,  
721 2021). Similarly, in the UK the number of insects found splattered on car numberplates has  
722 reduced by 64% in the 18 years since 2004 (Ball et al., 2022). When compared to their  
723 sedentary counterparts, however, migratory Diptera that have wide habitat ranges and  
724 multiple generations throughout the year, are thought to be more resilient to the effects of  
725 climate change (Biesmeijer et al., 2006). Even so, the few studies that do exist on migratory  
726 Dipteran declines are still damning. For example, in the last 50 years the number of  
727 aphidophagous Syrphidae autumnally migrating through Randecker Maar in the  
728 Schwäbische Alb uplands of southwest Germany has declined by 97% (Gatter et al., 2020).  
729 These declines may have drastic impacts on the rest of the natural world. For example,  
730 North American insectivorous bird numbers have dropped by an estimated 2.9 billion in the  
731 last 50 years, compared to non-insectivorous birds whose numbers have increased by 26.2  
732 million individuals (Tallamy & Shriver, 2021). A recent European study on Syrphidae has  
733 predicted the loss of some sedentary species from lowland areas and gains in alpine  
734 locations (Miličić et al., 2018). The majority of agriculture is found in lowland regions and so  
735 the loss of these insect pollinators could negatively impact the crop yield. Migratory species  
736 of Syrphidae have high reproductive rates and mobility and, like other insect migrants (M. B.  
737 Baker et al., 2015; Bale & Hayward, 2010; Zeng et al., 2020), could be more capable of  
738 adapting to climate change, making them particularly important for counteracting damage  
739 to the crops caused by poleward shifts in pests such as aphids (Bebber et al., 2013).

740

741 These declines are due to a variety of factors, but the main causes are climate change and  
742 habitat loss (Goulson, 2019). Insects are thought to be particularly susceptible to extreme

743 weather events such as prolonged droughts or reduced periods of sunshine and increased  
744 rainfall (Dennis & Sparks, 2007; Ewald et al., 2015). Agricultural intensification has led to  
745 large-scale habitat loss for migratory insects due to monotypic crops and increased pesticide  
746 usage preventing the insects from finding a suitable food source while on migration (Benton  
747 et al., 2002; Ewald et al., 2015; Gruebler et al., 2008).

748

749 Shifts in migratory insect assemblages are expected to have occurred over the last century,  
750 with a favouring towards the pest species which rely on human crops. This has meant that  
751 the overall insect biomass in many locations has not changed, yet the types of insects of  
752 which the biomass is comprised has shifted (Guo et al., 2020). A 15 year systematic  
753 monitoring of migratory insects in northeastern Asia showed that while 79% of insect  
754 population sizes remained stable over the time period, beneficial insects to humans such as  
755 the pest controlling Odonata declined by 90%, and population levels of certain crop pests  
756 exhibited an upwards trend (Guo et al., 2015). Further long-term monitoring studies have  
757 also found little change in overall biomass over their study's duration (Hu et al., 2016).  
758 However, given the documented declines of many beneficial insect species (Gatter et al.,  
759 2020; Hallmann et al., 2021), the numbers of these declining insects are likely being  
760 replaced by less beneficial taxa. However, some pest species such as the migratory moths  
761 (Silver Y *Autographa gamma*, Black Cutworm *Agrotis ipsilon*, and the turnip moth *Agrotis*  
762 *segetum*) have also shown declines, highlighting the need for further research.

763

764 **Climate change and Migratory Diptera**

765 The Earth is currently subject to mass climate change because of anthropogenic actions  
766 (Ceballos et al., 2015). Migratory Diptera will not be exempt from the effects of climate  
767 change and will be affected in myriad ways. Studies specifically focussing on climate change  
768 and migratory Diptera are sparse, yet the main trends are likely reflected in other, better  
769 studied, migratory insect taxa and so parallels will be drawn throughout this section.

770

771 Global temperatures are likely due to rise between 2-4.9°C above pre-industrial levels by  
772 2100 (Raftery et al., 2017). Increasing temperatures could see higher latitude countries  
773 receiving more Dipteran migrants. Correlations between 113 years of migratory Lepidoptera  
774 abundance and temperature have shown that these migrants have become more abundant  
775 in the UK with increasing temperatures (T. H. Sparks et al., 2007). This is thought to be in  
776 part because of increased desiccation in southern Europe encouraging northward migration  
777 (T. H. Sparks et al., 2007), something that is likely mirrored by Dipteran migrants. Increasing  
778 temperatures in higher latitudes is also increasing the suitability for migrants to persist  
779 overwinter. This could lead to the loss or rebalancing of migratory behaviour in many  
780 Dipteran species which tend to be partial migrants (Menz, Reynolds, et al., 2019). As a  
781 result, the ecological benefits of the Diptera due to their migratory behaviour (as detailed  
782 above) will also be lost. Interestingly, the presence of partial migration, where part of the  
783 population remains in the breeding area instead of migrating, in many species of migratory  
784 insect may lead to a level of resilience to climate shifts (Menz, Reynolds, et al., 2019). For  
785 example, some individuals of the migratory Syrphid *E. balteatus* overwinter in parts of  
786 central Europe (Luder et al., 2018; Odermatt et al., 2017; L. Raymond et al., 2014), and can  
787 do so in all life stages, from eggs, larvae, pupae and adults (L. Raymond et al., 2014). These

788 overwintering animals provide critical early-season control of aphids colonising crops early  
789 in the growing season before the migratory individuals have arrived (Raymond et al. 2014).  
790 With warming climates, we may see an increase in the proportion of individuals and species  
791 overwintering and forgoing migration.

792

793 Increasing temperatures due to climate breakdown could also lead to phenological  
794 asynchronies between taxa. The timing of Dipteran migration may be linked to temperature  
795 as seen in some migratory butterflies such as the red admiral (*Vanessa atalanta*) (T. H.  
796 Sparks et al., 2005), indeed the phenology of first sighting of Syrphidae in the UK has  
797 advanced earlier in the year as the planet warms (Hassall, et al., 2017). Myriad other  
798 organisms may rely upon (or are relied upon by) the arrival of Dipteran migrants such as  
799 Passerine birds, which may need the influx of migratory insects to help feed their young, or  
800 wildflowers who provide a vital food source for the migrating Diptera (and who may rely on  
801 the Diptera for pollination services) (Hawkes et al., 2022; Losey & Vaughan, 2006). If these  
802 organisms rely upon day-length and not temperature to dictate their activities, then  
803 asynchrony could have disastrous impacts (Mayor et al., 2017). A literature review on the  
804 ecological impacts of temperature-mediated trophic asynchrony revealed that there is a  
805 dearth in studies on the subject (Samplonius et al., 2021). The studies that do exist are  
806 biased towards terrestrial higher trophic secondary consumer taxa such as the birds, and  
807 the southern hemisphere is largely understudied (Samplonius et al., 2021). Far more  
808 research is needed in this field to inform conservation efforts and to understand the  
809 possible consequences of phenological change.

810



811 The range of many wind-borne Dipteran migrants are expanding in response to increases in  
812 temperature, as seen in some *Aedes* spp. Mosquitoes, which are important vectors of  
813 diseases such as malaria. Wind patterns that bore mosquitoes to high altitude settlements  
814 in the Himalayan region used to pose no threat to the humans as the cold temperatures  
815 would kill the mosquitoes (Dhimal et al., 2021). However, with global warming the  
816 mosquitoes can now survive in these regions and transmit fatal diseases such as malaria,  
817 thus posing a serious threat to these unprepared communities (Dhimal et al., 2021). This  
818 problem is not limited to this one example, as increasing temperatures globally mean that  
819 higher latitude countries are now at threat from these mosquito-vectorated diseases due to  
820 the increased favourability in conditions for mosquito survival (Agyekum et al., 2021).

821 Furthermore, the response of disease vectors to changes in climatic conditions within their  
822 distribution has significant consequences for predicting and managing outbreaks of disease.

823

824 Increased extreme weather events such as long droughts or extended periods of rainfall due  
825 to climate breakdown are thought to have negative impacts on migratory Diptera  
826 populations due to changes in habitat suitability. Increased drought may cause vegetation to  
827 wither prematurely and the eggs of Diptera to dry out and become unviable. Similarly,  
828 increased rainfall may be detrimental to Diptera larvae that develop underground, as they  
829 can drown in the waterlogged soil. However, droughts and the loss of moist habitats can  
830 lead to a reduction in the availability of suitable breeding sites for many saprophagous  
831 species that have semi-aquatic larvae, such as the Syrphid *E. tenax*.

832

833 Finally, increased CO<sub>2</sub> levels have been shown to reduce the amount of nitrogen in plant  
834 leaves by 10-30%. As a result, herbivory levels by crop pests (including many migratory  
835 Diptera) are thought to increase 20-90% to compensate for this reduced nitrogen availability  
836 (Kinney et al., 1997; Roth & Lindroth, 1994, 1995), potentially leading to increased crop  
837 damage and resultant costs to growers. Very little is known about the response of migratory  
838 Diptera to climate change. Research into the ecological roles, range-shifts, and declines of  
839 these hugely important species is desperately needed so that their impacts can be  
840 understood and either encouraged or mitigated, particularly in the context of ecosystem  
841 and human health.

842

## 843 **Conclusion and future research**

844 Our analyses of the literature on migrant Diptera have revealed a highly diverse set of  
845 species, many of which appears to be highly abundant, and to migrate in huge numbers.  
846 They carry out a wide range of ecological roles that impact a large swathe of the globe and  
847 because of this, they should be considered an important and remarkable group of migrants  
848 globally. However, compared to other groups, very little is known and for many of the  
849 migratory families only a single study related to migration was uncovered. We recommend a  
850 greater focus on the diversity of Dipteran migrants, as many new discoveries await as we  
851 see in the new migratory behaviour uncovered in recent studies (Hawkes et al., 2022, 2024  
852 under review). In addition, this will help to understand the ecological roles these insects are  
853 performing as they connect distant landscapes. Techniques such as monitoring and trapping  
854 in migration hotspots, stable isotope and pollen analysis, trajectory analysis, flight  
855 simulators and flight mills, and NDVI measurements, along with emerging approaches such

856 as networks of radar, can be used to infer behaviour, assemblages, origins, destinations and  
857 the headings and numbers of mass movements of Dipteran migrants.

858

859 Many anthropogenically beneficial Dipteran migrants are under threat from climate change  
860 and other anthropogenic impacts. It is possible that many migratory flies and their  
861 behaviour could disappear without even being documented. To conserve these vitally  
862 important taxa, it is not enough to simply protect or restore habitat at one location: the  
863 entire migratory route must be capable of sustaining these insects, as for other migratory  
864 species (Runge et al., 2014). Slightly altering agricultural, rewilding and conservation  
865 practices to ensure landscape connectivity could have the greatest impact in this regard.  
866 Migratory pollinators from other taxa are known to use corridors of sequentially blooming  
867 flowers and any loss of flowering plant populations along these corridors could have severe  
868 negative impacts on the survival of migratory Diptera (Nabhan, 2004). The maintenance of  
869 hedgerows and other woody structures in otherwise barren agricultural landscapes can also  
870 provide key microclimate refugia for overwintering or oversummering individuals (Raymond  
871 et al. 2014). Reducing pesticide usage and providing wildflower strips alongside (or within)  
872 fields for these migratory Diptera to feed on during migration would be of major help  
873 (Haaland et al., 2011). In setting future conservation measures, it is key to understand the  
874 migratory cycles and pathways of these ecologically important species. It is hoped that this  
875 review inspires many further studies into these remarkable Dipteran migrants.

876

877 **References**

- 878 Gyekum, T. P., Botwe, P. K., Arko-Mensah, J., Issah, I., Acquah, A. A., Hogarh, J. N., Dwomoh, D.,  
879 Robins, T. G., & Fobil, J. N. (2021). A systematic review of the effects of temperature on  
880 *Anopheles* mosquito development and survival: implications for malaria control in a future  
881 warmer climate. *International Journal of Environmental Research and Public Health*, **18**(14),  
882 7255.
- 883 Anderson, G. S. (2011). Comparison of decomposition rates and faunal colonization of carrion in  
884 indoor and outdoor environments. *Journal of Forensic Sciences*, **56**(1), 136–142.
- 885 Anderson, R. C. (2009). Do dragonflies migrate across the western Indian Ocean? *Journal of*  
886 *Tropical Ecology*, **25**(4), 347–358.
- 887 Ashmole, N.P. and Ashmole, M.J., 1988. Insect dispersal on Tenerife, Canary Islands: high altitude  
888 fallout and seaward drift. *Arctic and Alpine Research*, **20**(1), pp.1-12.
- 889 Aubert, J., Aubert, J.-J., & Goeldlin, P. (1976). Twelve years of systematic collecting of syrphids  
890 (Diptera) at the Bretolet pass (Alps of Valais). *Mitteilungen Der Schweizerischen*  
891 *Entomologischen Gesellschaft*, **49**(1/2), 115–142.
- 892 Babic, I., Baranov, N., & Ganslmayer, R. (1935). The Golubatz Fly in 1934. *Arch. Tierheilk.*, **69**(3).
- 893 Baker, M. B., Venugopal, P. D., & Lamp, W. O. (2015). Climate change and phenology: *Empoasca*  
894 *fabae* (Hemiptera: Cicadellidae) migration and severity of impact. *PLoS One*, **10**(5),  
895 e0124915.
- 896 Baker, R. H. A., Guillet, P., Seketeli, A., Poudiougou, P., Boakye, D., Wilson, M. D., & Bissan, Y.  
897 (1990). Progress in controlling the reinvasion of windborne vectors into the western area of  
898 the Onchocerciasis Control Programme in West Africa. *Philosophical Transactions of the*  
899 *Royal Society of London. B, Biological Sciences*, **328**(1251), 731–750.

- 90Bale, J. S., & Hayward, S. A. L. (2010). Insect overwintering in a changing climate. *Journal of*  
901 *Experimental Biology*, **213**(6), 980–994.
- 90Ball, L., Still, R., Riggs, A., Skilbeck, A., Shardlow, M., Whitehouse, A., & Tinsley-Marshall, P.  
903 (2022). The Bugs Matter Citizen Science Survey: Counting insect’splats’ on vehicle number  
904 plates. *policycommons.net*
- 90Bebber, D. P., Ramotowski, M. A. T., & Gurr, S. J. (2013). Crop pests and pathogens move  
906 polewards in a warming world. *Nature Climate Change*, **3**(11), 985–988.
- 90Beebe, W. (1951). Migration of insects (other than Lepidoptera) through Portachuelo Pass,  
908 Rancho Grande, north-central Venezuela. *Zoologica: Scientific Contributions of the New York*  
909 *Zoological Society*, **36**(20), 255–266.
- 91Benton, T. G., Bryant, D. M., Cole, L., & Crick, H. Q. P. (2002). Linking agricultural practice to  
911 insect and bird populations: a historical study over three decades. *Journal of Applied*  
912 *Ecology*, **39**(4), 673–687.
- 91Biesmeijer, J. C., Roberts, S. P. M., Reemer, M., Ohlemuller, R., Edwards, M., Peeters, T.,  
914 Schaffers, A. P., Potts, S. G., Kleukers, R., & Thomas, C. D. (2006). Parallel declines in  
915 pollinators and insect-pollinated plants in Britain and the Netherlands. *Science*, **313**(5785),  
916 351–354.
- 91Bishopp, F. C. (1913). The stable fly (*Stomoxys calcitrans* L.), an important live stock pest. *Journal*  
918 *of Economic Entomology*, **6**(1), 112–126.
- 91Braverman, I. v, & Chechik, P. (1993). Introduction of Culicoides (Diptera, Ceratopogonidae).  
920 *Israel Journal of Veterinary Medicine*, **48**.

- 92 Brenton, L. C. L. (1844). *The Septuagint Version of the Old Testament, According to the Vatican*  
922 *Text, Tr. Into English: with the Principal Various Readings of the Alexandrine Copy, and a*  
923 *Table of Comparative Chronology* (Vol. 1). S. Bagster.
- 92 Brightwell, R., Dransfield, R. D., Stevenson, P., & Williams, B. (1997). Changes over twelve years in  
925 populations of *Glossina pallidipes* and *Glossina longipennis* (Diptera: Glossinidae) subject to  
926 varying trapping pressure at Nguruman, south-west Kenya. *Bulletin of Entomological*  
927 *Research*, **87**(4), 349–370.
- 92 Bueno-Marí, R., Drago, A., Montalvo, T., Dutto, M., & Becker, N. (2022). Classic and novel tools  
929 for mosquito control worldwide. *Ecology and Control of Vector-borne Diseases* (pp. 234–  
930 238). Wageningen Academic Publishers.
- 93 Campbell, J. B., Boxler, D. J., & Adams, D. C. (2002). Stable fly, *Stomoxys calcitrans*, (Diptera:  
932 Muscidae) numbers trapped at Nebraska sandhill pasture sites from 1998-2002. *The 2002*  
933 *ESA Annual Meeting and Exhibition*.
- 93 Ceballos, G., Ehrlich, P. R., Barnosky, A. D., García, A., Pringle, R. M., & Palmer, T. M. (2015).  
935 Accelerated modern human-induced species losses: Entering the sixth mass extinction.  
936 *Science Advances*, **1**(5), e1400253.
- 93 Chapman, J. W., Nesbit, R. L., Burgin, L. E., Reynolds, D. R., Smith, A. D., Middleton, D. R., & Hill, J.  
938 K. (2010). Flight orientation behaviors promote optimal migration trajectories in high-flying  
939 insects. *Science*, **327**(5966), 682–685.
- 94 Chapman, J. W., Nilsson, C., Lim, K. S., Bäckman, J., Reynolds, D. R., & Alerstam, T. (2016).  
941 Adaptive strategies in nocturnally migrating insects and songbirds: contrasting responses to  
942 wind. *Journal of Animal Ecology*, **85**(1), 115–124.

- 943 Chapman, J. W., Reynolds, D. R., Smith, A. D., Smith, E. T., & Woiwod, I. P. (2004). An aerial  
944 netting study of insects migrating at high altitude over England. *Bulletin of Entomological*  
945 *Research*, **94**(2). <https://doi.org/10.1079/ber2004287>
- 946 Chapman, J. W., Reynolds, D. R., & Wilson, K. (2015). Long-range seasonal migration in insects:  
947 mechanisms, evolutionary drivers and ecological consequences. *Ecology Letters*, **18**(3), 287–  
948 302.
- 949 Howdhury, S., Fuller, R.A., Dingle, H., Chapman, J.W. and Zalucki, M.P., 2021. Migration in  
950 butterflies: a global overview. *Biological Reviews*, **96**(4), pp.1462-1483.
- 951 Chown K, S. L. & L. (1994). Recently established Diptera and Lepidoptera on sub-antarctic Marion  
952 Island. *African Entomology*, **2**(1), 57–60.
- 953 Šiřková, H., Pastor, B., Kozánek, M., Martínez-Sánchez, A., Rojo, S., & Takáč, P. (2012).  
954 Biodegradation of pig manure by the housefly, *Musca domestica*: a viable ecological strategy  
955 for pig manure management. *Plos One*, **7**(3), e32798.
- 956 Lem, C.S., Hobson, K.A. and Harmon-Threatt, A.N., (2023). Insights into natal origins of migratory  
957 Nearctic hover flies (Diptera: Syrphidae): new evidence from stable isotope ( $\delta^2\text{H}$ )  
958 assignment analyses. *Ecography*, **2023**(2), p.e06465.
- 959 Colón-González, F. J., Sewe, M. O., Tompkins, A. M., Sjödin, H., Casallas, A., Rocklöv, J., Caminade,  
960 C., & Lowe, R. (2021). Projecting the risk of mosquito-borne diseases in a warmer and more  
961 populated world: a multi-model, multi-scenario intercomparison modelling study. *The*  
962 *Lancet Planetary Health*, **5**(7), e404–e414.

- 963 Costa-Júnior, L. M., Chaves, D. P., Brito, D. R. B., Santos, V. A. F. dos, Costa-Júnior, H. N., & Barros,  
964 A. T. M. (2019). A review on the occurrence of *Cochliomyia hominivorax* (Diptera:  
965 Calliphoridae) in Brazil. *Revista Brasileira de Parasitologia Veterinária*, **28**, 548–562.
- 966 Courtney, G. W., Pape, T., Skevington, J. H., & Sinclair, B. J. (2009). Biodiversity of diptera. *Insect*  
967 *Biodiversity*.
- 968 Bao, A., Yaro, A. S., Diallo, M., Timbiné, S., Huestis, D. L., Kassogué, Y., Traoré, A. I., Sanogo, Z. L.,  
969 Samaké, D., & Lehmann, T. (2014). Signatures of aestivation and migration in Sahelian  
970 malaria mosquito populations. *Nature*, **516**(7531), 387–390.
- 971 Davis, D. J. (2013). *The phylogenetics of Tachinidae (Insecta: Diptera) with an emphasis on*  
972 *subfamily structure*. (Doctoral dissertation, Wright State University)
- 973 Dennis, R. L. H., & Sparks, T. H. (2007). Climate signals are reflected in an 89 year series of British  
974 Lepidoptera records. *European Journal of Entomology*, **104**(4), 763.
- 975 Dhimal, M., Kramer, I. M., Phuyal, P., Budhathoki, S. S., Hartke, J., Ahrens, B., Kuch, U.,  
976 Groneberg, D. A., Nepal, S., & Liu, Q.-Y. (2021). Climate change and its association with the  
977 expansion of vectors and vector-borne diseases in the Hindu Kush Himalayan region: a  
978 systematic synthesis of the literature. *Advances in Climate Change Research*, **12**(3), 421–  
979 429.
- 980 Diakova, A. v, Schepetov, D. M., Oyun, N. Y., Shatalkin, A. I., & Galinskaya, T. v. (2018). Assessing  
981 genetic and morphological variation in populations of Eastern European *Lucilia sericata*  
982 (Diptera: Calliphoridae). *European Journal of Entomology*, **115**, 192–197.
- 983 Dingle, H. (2014). *Migration: the biology of life on the move*. Oxford University Press, USA.



- 98 Doyle, T., Hawkes, W. L. S., Massy, R., Powney, G. D., Menz, M. H. M., & Wotton, K. R. (2020).  
985 Pollination by hoverflies in the Anthropocene: Pollination by Hoverflies. In *Proceedings of*  
986 *the Royal Society B: Biological Sciences*, **287**, 1927. <https://doi.org/10.1098/rspb.2020.0508>
- 98 Doyle, T., Jimenez-Guri, E., Hawkes, W. L. S., Massy, R., Mantica, F., Permanyer, J., Cozzuto, L.,  
988 Hermoso Pulido, T., Baril, T., & Hayward, A. (2022). Genome-wide transcriptomic changes  
989 reveal the genetic pathways involved in insect migration. *Molecular Ecology*, **31**(16), 4332–  
990 4350.
- 99 Eagles, D., Melville, L., Weir, R., Davis, S., Bellis, G., Zalucki, M. P., Walker, P. J., & Durr, P. A.  
992 (2014). Long-distance aerial dispersal modelling of *Culicoides* biting midges: case studies of  
993 incursions into Australia. *BMC Veterinary Research*, **10**(1), 1–10.
- 994 Bejer, M. J., & Bensusan, K. (2010). Hoverflies (Diptera, Syrphidae) recently encountered on  
995 Gibraltar, with two species new for Iberia. *Dipterists Digest*, **17**, 123–139.
- 996 codiptera. (2009). *Ecodiptera – implementation of a management model for the ecologically*  
997 *sustainable treatment of pig manure in the Region of Los Serranos, Valencia-Spain*. Available  
998 at: <https://tinyurl.com/y2qg4e3g>
- 999 lser, J. J., Fagan, W. F., Denno, R. F., Dobberfuhl, D. R., Folarin, A., Huberty, A., Interlandi, S.,  
1000 Kilham, S. S., McCauley, E., & Schulz, K. L. (2000). Nutritional constraints in terrestrial and  
1001 freshwater food webs. *Nature*, **408**(6812), 578–580.
- 1002 l-Wakeil, N., & Volkmar, C. (2011). Effect of weather conditions on frit fly (*Oscinella frit*, Diptera:  
1003 Chloropidae) activity and infestation levels in spring wheat in central Germany. *Gesunde*  
1004 *Pflanzen*, **63**(4), 159–165.

- 1005wald, J. A., Wheatley, C. J., Aebischer, N. J., Moreby, S. J., Duffield, S. J., Crick, H. Q. P., &  
1006 Morecroft, M. B. (2015). Influences of extreme weather, climate and pesticide use on  
1007 invertebrates in cereal fields over 42 years. *Global Change Biology*, **21**(11), 3931–3950.
- 1008Inch, J. T. D., & Cook, J. M. (2020). Flies on vacation: evidence for the migration of Australian  
1009 Syrphidae (Diptera). *Ecological Entomology*, **45**(4), 896–900.
- 1010ischer, O. A., Matlova, L., Dvorska, L., Švástová, P., Bartoš, M., Weston, R. T., & Pavlik, I. (2006).  
1011 Various stages in the life cycle of syrphid flies (*Eristalis tenax*; Diptera: Syrphidae) as  
1012 potential mechanical vectors of pathogens causing mycobacterial infections in pig herds.  
1013 *Folia Microbiologica*, **51**(2), 147–153.
- 1014isler, L., & Marcacci, G. (2022). Tens of thousands of migrating hoverflies found dead on a  
1015 strandline in the South of France. *Insect Conservation and Diversity*. DOI:  
1016 10.1111/icad.12616
- 1017Fleming, T. H., Eby, P., Kunz, T. H., & Fenton, M. B. (2003). Ecology of bat migration. *Bat Ecology*,  
1018 **156**, 164–165.
- 1019lorio, J., Verú, L. M., Dao, A., Yaro, A. S., Diallo, M., Sanogo, Z. L., Samaké, D., Huestis, D. L.,  
1020 Yossi, O., & Talamas, E. (2020). Diversity, dynamics, direction, and magnitude of high-  
1021 altitude migrating insects in the Sahel. *Scientific Reports*, **10**(1), 1–14.
- 1022rancuski, L., Djuracic, M., Ludoški, J., Hurtado, P., Pérez-Bañón, C., Ståhls, G., Rojo, S., &  
1023 Milankov, V. (2014). Shift in phenotypic variation coupled with rapid loss of genetic diversity  
1024 in captive populations of *Eristalis tenax* (Diptera: Syrphidae): consequences for rearing and  
1025 potential commercial use. *Journal of Economic Entomology*, **107**(2), 821–832.

- 1025unk, C., Hoell, A., Shukla, S., Husak, G., & Michaelsen, J. (2016). The East African monsoon  
1027 system: seasonal climatologies and recent variations. *The Monsoons and Climate Change:  
1028 Observations and Modeling*, 163–185.
- 1029ao, B., Wotton, K. R., Hawkes, W. L. S., Menz, M. H. M., Reynolds, D. R., Zhai, B.-P., Hu, G., &  
1030 Chapman, J. W. (2020). Adaptive strategies of high-flying migratory hoverflies in response to  
1031 wind currents. *Proceedings of the Royal Society B*, **287**(1928), 20200406.
- 1032arms, R., Walsh, J. F., & Davies, J. B. (1979). Studies on the reinvasion of the Onchocerciasis  
1033 Control Programme in the Volta River Basin by *Simulium damnosum* sl with emphasis on the  
1034 south-western areas. *Tropenmedizin Und Parasitologie*, **30**(3), 345–362.
- 1035atter, W., 1977. Eine Wanderung der Erdschnake (*Tipula oleracea* l.). Passive Verdriftung oder  
1036 gerichtete Migration. *Nachrichtenblatt Bayerischer Entomologen*, **26**, pp.141-152.
- 1037atter, W. (1980). Nordwärts gerichtete Frühjahrswanderungen palaearktischer Schmetterlinge,  
1038 Fliegen und Hummeln im Himalaya-und Transhimalayagebiet Nepals. *Atalanta*, **11**, 188–196.
- 1039atter, W., Ebenhöf, H., Kima, R., Gatter, W., & Scherer, F. (2020). 50-jährige Untersuchungen an  
1040 migrierenden Schwebfliegen, Waffenschwebfliegen und Schlupfwespen belegen extreme  
1041 Rückgänge (Diptera: Syrphidae, Stratiomyidae; Hymenoptera: Ichneumonidae).  
1042 *Entomologische Zeitschrift Schwanfeld*, **130**(3), 131–142.
- 1043erry, A. C. (2007). *Predicting and controlling stable flies on California dairies*. UCANR  
1044 Publications.
- 1045ibernau, M., Macquart, D., Diaz, A., House, D., Fern-Barrow, P., & Dorset, B. (2003). Pollen  
1046 viability and longevity in two species of Arum. *Aroideana*, **26**, 58–62.

- 1047 Click, P.A., 1939. The distribution of insects, spiders, and mites in the air. *United States*  
1048 *Department of Agriculture Technical bulletin* **673**, 1-151.
- 1049 Coulson, D. (2019). The insect apocalypse, and why it matters. *Current Biology*, **29**(19), R967–  
1050 R971.
- 1051 Greathead, D. J. (1962). The biology of *Stomorphina lunata* (Fabricius)(Diptera: Calliphoridae), a  
1052 predator of the eggs of Acrididae. *Proceedings of the Zoological Society of London*, **139**(1),  
1053 139–180.
- 1054 Gruebler, M. U., Morand, M., & Naef-Daenzer, B. (2008). A predictive model of the density of  
1055 airborne insects in agricultural environments. *Agriculture, Ecosystems & Environment*,  
1056 **123**(1–3), 75–80.
- 1057 Guerra, P. C., Keil, C. B., Stevenson, P. C., Mina, D., Samaniego, S., Peralta, E., Mazon, N., &  
1058 Chancellor, T. C. B. (2017). Larval performance and adult attraction of *Delia platura* (Diptera:  
1059 Anthomyiidae) in a native and an introduced crop. *Journal of Economic Entomology*, **110**(1),  
1060 186–191.
- 1061 Guo, J., Fu, X., Wu, X., Zhao, X., & Wu, K. (2015). Annual migration of *Agrotis segetum*  
1062 (Lepidoptera: Noctuidae): observed on a small isolated island in northern China. *PLoS One*,  
1063 **10**(6), e0131639.
- 1064 Guo, J., Fu, X., Zhao, S., Shen, X., Wyckhuys, K. A. G., & Wu, K. (2020). Long-term shifts in  
1065 abundance of (migratory) crop-feeding and beneficial insect species in northeastern Asia.  
1066 *Journal of Pest Science*, **93**(2), 583–594.
- 1067 Haaland, C., Naisbit, R. E., & Bersier, L. (2011). Sown wildflower strips for insect conservation: a  
1068 review. *Insect Conservation and Diversity*, **4**(1), 60–80.

1068 Øaest B, Liechti F, Hawkes WL, Chapman J, Åkesson S, Shamoun-Baranes J, Nesterova AP, Comor  
1070 V, Preatoni D, Bauer S. *Accepted*. Continental-scale patterns in diel flight timing of high-  
1071 altitude migratory insects. *Philosophical Transactions of the Royal Society B*

1072 Hallmann, C. A., Ssymank, A., Sorg, M., de Kroon, H., & Jongejans, E. (2021). Insect biomass  
1073 decline scaled to species diversity: General patterns derived from a hoverfly community.  
1074 *Proceedings of the National Academy of Sciences*, **118**(2), e2002554117.

1075 Hardy, A. C., & Cheng, L. (1986). Studies in the distribution of insects by aerial currents. III. Insect  
1076 drift over the sea. *Ecological Entomology*, **11**(3), 283–290.

1077 Hassall, Christopher, Jennifer Owen, and Francis Gilbert. "Phenological shifts in hoverflies  
1078 (Diptera: Syrphidae): linking measurement and mechanism." *Ecography* **40** 7 (2017): 853-  
1079 863.

1080 Hawkes, W. L. S., Walliker, E., Gao, B., Forster, O., Lacey, K., Doyle, T., Massy, R., Roberts, N. W.,  
1081 Reynolds, D. R., & Özden, Ö. (2022). Huge spring migrations of insects from the Middle East  
1082 to Europe: quantifying the migratory assemblage and ecosystem services. *Ecography*,  
1083 e06288.

1084 Hawkes, W. L., Weston, S. T., Cook, H., Doyle, T., Massy, R., Guri, E. J., Wotton Jimenez, R. E., &  
1085 Wotton, K. R. (2022). Migratory hoverflies orientate north during spring migration. *Biology*  
1086 *Letters*, **18**(10), 20220318.

1087 Hemingway, J., Penilla, R. P., Rodriguez, A. D., James, B. M., Edge W and Rogers, H., & Rodriguez,  
1088 M. H. (1997). Resistance management strategies in malaria vector mosquito control. A large-  
1089 scale field trial in Southern Mexico. *Pesticide Science*, **51**(3), 375–382.

- 1090 Hill, L. (2013). Long-term light trap data from Tasmania, Australia. *Plant Protection Quarterly*,  
1091 **28**(1), 22–27.
- 1092 Slaváček, A., Lučan, R. K., & Hadrava, J. (2022). Autumnal migration patterns of hoverflies  
1093 (Diptera: Syrphidae): interannual variability in timing and sex ratio. *PeerJ*, **10**, e14393.
- 1094 Hobson, K. A., Anderson, R. C., Soto, D. X., & Wassenaar, L. I. (2012). Isotopic Evidence That  
1095 Dragonflies (*Pantala flavescens*) Migrating through the Maldives Come from the Northern  
1096 Indian Subcontinent. In *PLoS ONE* **7**, 12. <https://doi.org/10.1371/journal.pone.0052594>
- 1097 Fogsette, J. A., & Ruff, J. P. (1985). Stable fly (Diptera: Muscidae) migration in northwest Florida.  
1098 *Environmental Entomology*, **14**(2), 170–175.
- 1099 Bondelmann, P., & Poehling, H. (2007). Diapause and overwintering of the hoverfly *Episyrphus*  
1100 *balteatus*. *Entomologia Experimentalis et Applicata*, **124**(2), 189–200.
- 1101 Howard, E., & Davis, A. K. (2009). The fall migration flyways of monarch butterflies in eastern  
1102 North America revealed by citizen scientists. *Journal of Insect Conservation*, **13**, 279–286.
- 1103 Lu, G., Lim, K. S., Horvitz, N., Clark, S. J., Reynolds, D. R., Sapir, N., & Chapman, J. W. (2016). Mass  
1104 seasonal bioflows of high-flying insect migrants. *Science* **354**, 6319, pp. 1584–1587.  
1105 <https://doi.org/10.1126/science.aah4379>
- 1106 Lu, G., Stefanescu, C., Oliver, T. H., Roy, D. B., Brereton, T., van Swaay, C., Reynolds, D. R., &  
1107 Chapman, J. W. (2021). Environmental drivers of annual population fluctuations in a trans-  
1108 Saharan insect migrant. *Proceedings of the National Academy of Sciences*, **118**(26).
- 1109 Questis, D. L., Dao, A., Diallo, M., Sanogo, Z. L., Samake, D., Yaro, A. S., Ousman, Y., Linton, Y.-M.,  
1110 Krishna, A., & Veru, L. (2019). Windborne long-distance migration of malaria mosquitoes in  
1111 the Sahel. *Nature*, **574**(7778), 404–408.

- 1112 Jacquard, C., Virgilio, M., David, P., Quilici, S., de Meyer, M., & Delatte, H. (2013). Population  
1113 structure of the melon fly, *Bactrocera cucurbitae*, in Reunion Island. *Biological Invasions*, **15**,  
1114 759–773.
- 1115 Jensen, J.-K. (2001). An invasion of migrating insects (Syrphidae and Lepidoptera) on the Faroe  
1116 Islands in September 2000. *Norwegian Journal of Entomology*, **48**, 263–268.
- 1117 Jia, H., Liu, Y., Li, X., Li, H., Pan, Y., Hu, C., Zhou, X., Wyckhuys, K. A. G., & Wu, K. (2022).  
1118 Windborne migration amplifies insect-mediated pollination services. *Elife*, **11**, e76230.
- 1119 Jones, C. M., Parry, H., Tay, W. T., Reynolds, D. R., & Chapman, J. W. (2019). Movement ecology  
1120 of pest *Helicoverpa*: implications for ongoing spread. *Annual Review of Entomology*, **64**,  
1121 277–295.
- 1122 Keaster, A. J., Grundler, J. A., Craig, W. S., & Jackson, M. A. (1996). Noctuid moths and other  
1123 insects captured in wing-style traps baited with black cutworm (Lepidoptera: Noctuidae)  
1124 pheromone on offshore oil platforms in the Gulf of Mexico, 1988-1991. *Journal of the*  
1125 *Kansas Entomological Society*, 17–25.
- 1126 Kennedy, J. S. (1985). Migration, behavioral and ecological. *Migration: Mechanisms and Adaptive*  
1127 *Significance*.
- 1128 Kinney, K. K., Lindroth, R. L., Jung, S. M., & Nordheim, E. v. (1997). Effects of CO<sub>2</sub> and NO<sub>3</sub>-  
1129 availability on deciduous trees: phytochemistry and insect performance. *Ecology*, **78**(1),  
1130 215–230.
- 1131 Knoblauch, A., Thoma, M., & Menz, M. H. M. (2021). Autumn southward migration of dragonflies  
1132 along the Baltic coast and the influence of weather on flight behaviour. *Animal Behaviour*,  
1133 **176**, 99–109.

- 1134 Kurahashi, H. (1991). The calyptrate muscoid flies collected on weather ships located at the  
1135 ocean weather stations. *Japanese Journal of Sanitary Zoology*, **42**(1), 53–55.
- 1136 Kurahashi, H. (1997). Witnessing hundreds of *Calliphora nigribarbis* in migratory flight and  
1137 landing in Nagasaki, Western Japan. *Med. Entomol. Zool.*, **48**, 55–58.
- 1138 Back, D., & Lack, E. (1951). Migration of insects and birds through a Pyrenean pass. *The Journal of*  
1139 *Animal Ecology*, 63–67.
- 1140 Debl, K., Zित्रा, C., Silbermayr, K., Obwaller, A., Berer, D., Brugger, K., Walter, M., Pinior, B.,  
1141 Fuehrer, H.-P., & Rubel, F. (2015). Mosquitoes (Diptera: Culicidae) and their relevance as  
1142 disease vectors in the city of Vienna, Austria. *Parasitology Research*, **114**, 707–713.
- 1143 Bi, X., Wu, M., Ma, J., Gao, B., Wu, Q., Chen, A., Liu, J., Jiang, Y., Zhai, B., & Early, R. (2020).  
1144 Prediction of migratory routes of the invasive fall armyworm in eastern China using a  
1145 trajectory analytical approach. *Pest Management Science*, **76**(2), 454–463.
- 1146 Liu, M., Wang, X., Ma, L., Cao, L., Liu, H., Pu, D., & Wei, S. (2019). Genome-wide developed  
1147 microsatellites reveal a weak population differentiation in the hoverfly *Eupeodes corollae*  
1148 (Diptera: Syrphidae) across China. *Plos One*, **14**(9), e0215888.
- 1149 Posey, J. E., & Vaughan, M. (2006). The economic value of ecological services provided by insects.  
1150 *Bioscience*, **56**(4), 311–323.
- 1151 Luder, K., Knop, E., & Menz, M. H. M. (2018). Contrasting responses in community structure and  
1152 phenology of migratory and non-migratory pollinators to urbanization. *Diversity and*  
1153 *Distributions*, **24**(7), 919–927.
- 1154 Guo, L., Xia, H., & Lu, B.-R. (2019). Crop breeding for drought resistance. *Frontiers in Plant Science*,  
1155 **10**, 314.



- 1156ysenkov, S. N. (2009). On the estimation of the influence of the character of insect pollinators  
1157 movements on the pollen transfer dynamics. *Entomological Review*, **89**(2), 143–149.
- 1158Massy, R., Hawkes, W. L. S., Doyle, T., Troscianko, J., Menz, M. H. M., Roberts, N. W., Chapman, J.  
1159 W., & Wotton, K. R. (2021). Hoverflies use a time-compensated sun compass to orientate  
1160 during autumn migration. *Proceedings of the Royal Society B*, **288**(1959), 20211805.
- 1161Mayor, S. J., Guralnick, R. P., Tingley, M. W., Otegui, J., Withey, J. C., Elmendorf, S. C., Andrew, M.  
1162 E., Leyk, S., Pearse, I. S., & Schneider, D. C. (2017). Increasing phenological asynchrony  
1163 between spring green-up and arrival of migratory birds. *Scientific Reports*, **7**(1), 1902.
- 1164Menz, M. H. M., Brown, B. v., & Wotton, K. R. (2019). Quantification of migrant hoverfly  
1165 movements (diptera: syrphidae) on the west coast of North America. In *Royal Society Open*  
1166 *Science* **6**, 4. <https://doi.org/10.1098/rsos.190153>
- 1167Menz, M. H. M., Reynolds, D. R., Gao, B., Hu, G., Chapman, J. W., & Wotton, K. R. (2019).  
1168 Mechanisms and consequences of partial migration in insects. *Frontiers in Ecology and*  
1169 *Evolution*, **7**, 403.
- 1170Menz, M. H. M., Scacco, M., Bürki-Spycher, H.-M., Williams, H. J., Reynolds, D. R., Chapman, J. W.,  
1171 & Wikelski, M. (2022). Individual tracking reveals long-distance flight-path control in a  
1172 nocturnally migrating moth. *Science*, **377**(6607), 764–768.
- 1173Meyer, B., Jauker, F., & Steffan-Dewenter, I. (2009). Contrasting resource-dependent responses  
1174 of hoverfly richness and density to landscape structure. *Basic and Applied Ecology*, **10**(2),  
1175 178–186.
- 1176Meyer, W. B., & Turner, B. L. (1992). Human population growth and global land-use/cover  
1177 change. *Annual Review of Ecology and Systematics*, 39–61.

- 1178 Mignotte, A., Garros, C., Dellicour, S., Jacquot, M., Gilbert, M., Gardès, L., Balenghien, T.,  
1179 Duhayon, M., Rakotoarivony, I., de Wavrechin, M. and Huber, K., 2021. High dispersal  
1180 capacity of *Culicoides obsoletus* (Diptera: Ceratopogonidae), vector of bluetongue and  
1181 Schmallenberg viruses, revealed by landscape genetic analyses. *Parasites & Vectors*, **14**(1),  
1182 pp.1-14.
- 1183 Mihok, S., & Clausen, P. H. (1996). Feeding habits of *Stomoxys* spp. stable flies in a Kenyan forest.  
1184 *Medical and Veterinary Entomology*, **10**(4), 392–394.
- 1185 Miličić, M., Vujić, A., & Cardoso, P. (2018). Effects of climate change on the distribution of  
1186 hoverfly species (Diptera: Syrphidae) in Southeast Europe. *Biodiversity and Conservation*,  
1187 **27**(5), 1173–1187.
- 1188 Moerkens, R., Boonen, S., Wäckers, F. L., & Pekas, A. (2021). Aphidophagous hoverflies reduce  
1189 foxglove aphid infestations and improve seed set and fruit yield in sweet pepper. *Pest*  
1190 *Management Science*, **77**(6), 2690–2696.
- 1191 Mramba, F., Broce, A. B., & Zurek, L. (2007). Vector competence of stable flies, *Stomoxys*  
1192 *calcitrans* L.(Diptera: Muscidae), for *Enterobacter sakazakii*. *Journal of Vector Ecology*, **32**(1),  
1193 134–139.
- 1194 Nabeshima, T., Loan, H. T. K., Inoue, S., Sumiyoshi, M., Haruta, Y., Nga, P. T., Huoung, V. T. Q., del  
1195 Carmen Parquet, M., Hasebe, F., & Morita, K. (2009). Evidence of frequent introductions of  
1196 Japanese encephalitis virus from south-east Asia and continental east Asia to Japan. *Journal*  
1197 *of General Virology*, **90**(4), 827–832.
- 1198 Nabhan, G. P. (2004). *Conserving migratory pollinators and nectar corridors in western North*  
1199 *America*. University of Arizona Press.

- 1200 Nielsen, T. R., Andreassen, A. T., & Leendertse A, S. S. (2010). A migration of the Hoverfly  
1201 *Helophilus trivittatus* (Fabricius, 1805)(Diptera, Syrphidae) to SW Norway in 2010.  
1202 *Norwegian Journal of Entomology*, **57**, 136–138.
- 1203 Nilssen, A. C., & Anderson, J. R. (1995). Flight capacity of the reindeer warble fly, *Hypoderma*  
1204 *tarandi* (L.), and the reindeer nose bot fly, *Cephenemyia trompe* (Modeer)(Diptera:  
1205 Oestridae). *Canadian Journal of Zoology*, **73**(7), 1228–1238.
- 1206 Odermatt, J., Frommen, J. G., & Menz, M. H. M. (2017). Consistent behavioural differences  
1207 between migratory and resident hoverflies. *Animal Behaviour*, **127**, 187–195.
- 1208 Barker, D. J., Burton, R. R., Diongue-Niang, A., Ellis, R. J., Felton, M., Taylor, C. M., Thorncroft, C.  
1209 D., Bessemoulin, P., & Tompkins, A. M. (2005). The diurnal cycle of the West African  
1210 monsoon circulation. *Quarterly Journal of the Royal Meteorological Society: A Journal of the*  
1211 *Atmospheric Sciences, Applied Meteorology and Physical Oceanography*, **131**(611), 2839–  
1212 2860.
- 1213 Basanen, M. (2020). *Characterization of Pectobacterium strains causing soft rot and blackleg of*  
1214 *potato in Finland*.
- 1215 Bedersen, L., Thorup, K., & Tøttrup, A. P. (2019). Annual GPS tracking reveals unexpected  
1216 wintering area in a long-distance migratory songbird. *Journal of Ornithology* **160**, 1, pp. 265–  
1217 270. <https://doi.org/10.1007/s10336-018-1610-8>
- 1218 Bárez-Bañón, C., Juan, A., Petanidou, T., Marcos-García, M. A., & Crespo, M. B. (2003). The  
1219 reproductive ecology of *Medicago citrina* (Font Quer) Greuter (Leguminosae): a bee-  
1220 pollinated plant in Mediterranean islands where bees are absent. *Plant Systematics and*  
1221 *Evolution*, **241**(1), 29–46.

- 1222 Pérez-Bañón, C., Petanidou, T., & Marcos-García, M. (2007). Pollination in small islands by  
1223 occasional visitors: the case of *Daucus carota* subsp. *commutatus* (Apiaceae) in the  
1224 Columbretes archipelago, Spain. *Plant Ecology*, **192**(1), 133–151.
- 1225 Bineda, A., & Marcos-García, M. (2008). Evaluation of several strategies to increase the residence  
1226 time of *Episyrphus balteatus* (Diptera, Syrphidae) releases in sweet pepper greenhouses.  
1227 *Annals of Applied Biology*, **152**(3), 271–276.
- 1228 Bader, R., Cunningham, S. A., Howlett, B. G., & Inouye, D. W. (2020). Non-bee insects as visitors  
1229 and pollinators of crops: Biology, ecology, and management. *Annual Review of Entomology*,  
1230 **65**, 391–407.
- 1231 Bader, R., Edwards, W., Westcott, D. A., Cunningham, S. A., & Howlett, B. G. (2011). Pollen  
1232 transport differs among bees and flies in a human-modified landscape. *Diversity and*  
1233 *Distributions*, **17**(3), 519–529.
- 1234 Raftery, A. E., Zimmer, A., Frierson, D. M. W., Startz, R., & Liu, P. (2017). Less than 2 C warming by  
1235 2100 unlikely. *Nature Climate Change*, **7**(9), 637–641.
- 1236 Raymond, L., Sarthou, J.-P., Plantegenest, M., Gauffre, B., Ladet, S., & Vialatte, A. (2014).  
1237 Immature hoverflies overwinter in cultivated fields and may significantly control aphid  
1238 populations in autumn. *Agriculture, Ecosystems & Environment*, **185**, 99–105.
- 1239 Raymond, M., & Pasteur, N. (1996). Evolution of insecticide resistance in the mosquito *Culex*  
1240 *pipiens*: The migration hypothesis of amplified esterase genes. *Molecular genetics and*  
1241 *evolution of pesticide resistance*. **645**, pp. 90–96).
- 1242 Biad, M. H., Scoglio, C. M., McVey, D. S., & Cohnstaedt, L. W. (2017). An individual-level network  
1243 model for a hypothetical outbreak of Japanese encephalitis in the USA. *Stochastic*

- 1244 *environmental research and risk assessment*, **31**(2), 353–367.
- 1245 <https://doi.org/10.1007/s00477-016-1353-0>
- 1246 Bitchie, S. A., & Rochester, W. (2001). Wind-blown mosquitoes and introduction of Japanese  
1247 encephalitis into Australia. *Emerging Infectious Diseases*, **7**(5), 900.
- 1248 Bojo, S., FS, G., Marcos-García, M., Nieto, J. M., & Mier Durante, M. P. (2003). *A World Review of*  
1249 *Predatory Hoverflies (Diptera, Syrphidae: Syrphinae) and their Prey*. CIBIO Ediciones.
- 1250 Both, S. K., & Lindroth, R. L. (1994). Effects of CO<sub>2</sub>-mediated changes in paper birch and white  
1251 pine chemistry on gypsy moth performance. *Oecologia*, **98**, 133–138.
- 1252 Both, S. K., & Lindroth, R. L. (1995). Elevated atmospheric CO<sub>2</sub>: effects on phytochemistry, insect  
1253 performance and insect-parasitoid interactions. *Global Change Biology*, **1**(3), 173–182.
- 1254 Runge, C. A., Martin, T. G., Possingham, H. P., Willis, S. G., & Fuller, R. A. (2014). Conserving  
1255 mobile species. *Frontiers in Ecology and the Environment*, **12**(7), 395–402.
- 1256 Gáinz-Borgo, C., Miranda, J., & Lentino, M. (2020). Composition of bird community in Portachuelo  
1257 Pass (Henri Pittier National Park, Venezuela). *Journal of Caribbean Ornithology*, **33**, 1–14.
- 1258 Amplonius, J. M., Atkinson, A., Hassall, C., Keogan, K., Thackeray, S. J., Assmann, J. J., Burgess, M.  
1259 D., Johansson, J., Macphie, K. H., & Pearce-Higgins, J. W. (2021). Strengthening the evidence  
1260 base for temperature-mediated phenological asynchrony and its impacts. *Nature Ecology &*  
1261 *Evolution*, **5**(2), 155–164.
- 1262 Sánchez-Bayo, F., & Wyckhuys, K. A. G. (2019). Worldwide decline of the entomofauna: A review  
1263 of its drivers. *Biological Conservation*, **232**, 8–27.

- 1264atterfield, D. A., Sillett, T. S., Chapman, J. W., Altizer, S., & Marra, P. P. (2020). Seasonal insect  
1265 migrations: massive, influential, and overlooked. *Frontiers in Ecology and the Environment*,  
1266 **18**(6), 335–344.
- 1267hannon, H. J. (1926). A preliminary report on the seasonal migrations of insects. *Journal of the*  
1268 *New York Entomological Society*, **34**(2), 199–205.
- 1269hpedt, A. A., Aksenova, Yu. V., Shayakhmetov, M. R., Zhulanova, V. N., Rassypnov, V. A., &  
1270 Butyrin, M. V. (2019). Soil and Ecological evaluation of agro-chnozems of Siberia.  
1271 *International Transaction Journal of Engineering, Management, & Applied Sciences &*  
1272 *Technologies*, 309–318.
- 1273now, D. W., & Ross, K. F. A. (1952). Insect migration in the Pyrenees. *Entomol Mon Mag*, **88**, 1–  
1274 6.
- 1275outhwood, T. R. E., & Jepson, W. F. (1962). Studies on the populations of *Oscinella frit* L.(Dipt:  
1276 Chloropidae) in the oat crop. *The Journal of Animal Ecology*, 481–495.
- 1277parks, A. N., Jackson, R. D., Carpenter, J. E., & Muller, R. A. (1986). Insects captured in light traps  
1278 in the Gulf of Mexico. *Annals of the Entomological Society of America*, **79**(1), 132–139.
- 1279parks, T. H., Dennis, R. L. H., Croxton, P. J., & Cade, M. (2007). Increased migration of  
1280 Lepidoptera linked to climate change. *European Journal of Entomology*, **104**(1), 139–143.
- 1281parks, T. H., Roy, D. B., & Dennis, R. L. H. (2005). The influence of temperature on migration of  
1282 Lepidoptera into Britain. *Global Change Biology*, **11**(3), 507–514.
- 1283tefanescu, C., Páramo, F., Åkesson, S., Alarcón, M., Ávila, A., Brereton, T., Carnicer, J., Cassar, L.  
1284 F., Fox, R., Heliölä, J., Hill, J. K., Hirneisen, N., Kjellén, N., Kühn, E., Kuussaari, M., Leskinen,  
1285 M., Liechti, F., Musche, M., Regan, E. C., ... Chapman, J. W. (2013). Multi-generational long-

1286 distance migration of insects: Studying the painted lady butterfly in the Western Palaearctic.

1287 *Ecography* **36**, 4, pp. 474–486. <https://doi.org/10.1111/j.1600-0587.2012.07738.x>

1288 Malavera, G., García-Berro, A., Talla, V.N., Ng'iru, I., Bahleman, F., Kébé, K., Nzala, K.M., Plasencia,

1289 D., Marafi, M.A., Kassie, A. and Goudégnon, E.O., 2023. The Afrotropical breeding grounds

1290 of the Palearctic-African migratory painted lady butterflies (*Vanessa cardui*). *Proceedings of*

1291 *the National Academy of Sciences*, **120**(16), p.e2218280120.

1292 Tallamy, D. W., & Shriver, W. G. (2021). Are declines in insects and insectivorous birds related?

1293 *The Condor*, **123**(1), duaa059.

1294 Asacas, L. (1984). Nouvelles données sur la biogéographie et l'évolution du groupe *Drosophila*

1295 *melanogaster* en Afrique. Description de six nouvelles espèces (Diptera, Drosophilidae).

1296 *Annales de La Société Entomologique de France*, **20**, 419–438.

1297 Verhelst, B., Jansen, J., & Vansteelant, W. (2011). South West Georgia: an important bottleneck

1298 for raptor migration during autumn. *Ardea*, **99**(2), 137–146.

1299 Warren, T. L., Giraldo, Y. M., & Dickinson, M. H. (2019). Celestial navigation in *Drosophila*. *Journal*

1300 *of Experimental Biology*, **222**(Suppl\_1), jeb186148.

1301 Weir, P. T., & Dickinson, M. H. (2012). Flying *Drosophila* orient to sky polarization. *Current*

1302 *Biology*, **22**(1), 21–27.

1303 Westmacott, H. M., & Williams, C. B. (1954). A migration of Lepidoptera and Diptera in Nepal.

1304 *Entomologist*, **87**, 232–234.

1305 Wiegmann, B. M., Trautwein, M. D., Winkler, I. S., Barr, N. B., Kim, J.-W., Lambkin, C., Bertone, M.

1306 A., Cassel, B. K., Bayless, K. M., & Heimberg, A. M. (2011). Episodic radiations in the fly tree

1307 of life. *Proceedings of the National Academy of Sciences*, **108**(14), 5690–5695.

- 1308 Wikelski, M., Moskowitz, D., Adelman, J. S., Cochran, J., Wilcove, D. S., & May, M. L. (2006).  
1309 Simple rules guide dragonfly migration. *Biology Letters*, **2**(3), 325–329.
- 1310 Williams, C. B. (1958). Insect Migration. *New Naturalist* **36**. Collins.
- 1311 Williams, C. B., Common, I. F. B., French, R. A., Muspratt, V., & Williams, M. C. (1956).  
1312 Observations on the migration of insects in the Pyrenees in the autumn of 1953.  
1313 *Transactions of the Royal Entomological Society of London*, **108**(9), 385–407.
- 1314 Wolf, W.W., Sparks, A.N., Pair, S.D., Westbrook, J.K. and Truesdale, F.M., 1986. Radar  
1315 observations and collections of insects in the Gulf of Mexico. *Insect flight: dispersal and*  
1316 *migration* (pp. 221-234). Springer Berlin Heidelberg.
- 1317 Wotton, K. R., Gao, B., Menz, M. H. M., Morris, R. K. A., Ball, S. G., Lim, K. S., Reynolds, D. R., Hu,  
1318 G., & Chapman, J. W. (2019). Mass seasonal migrations of hoverflies provide extensive  
1319 pollination and crop protection services. *Current Biology*, **29**(13), 2167–2173.
- 1320 Deng, J., Liu, Y., Zhang, H., Liu, J., Jiang, Y., Wyckhuys, K. A. G., & Wu, K. (2020). Global warming  
1321 modifies long-distance migration of an agricultural insect pest. *Journal of Pest Science*, **93**,  
1322 569–581.
- 1323 Вараџић, В. С. (2005). *Живот и обичаји народа српскога* (Issue 9). Политика
- 1324
- 1325
- 1326
- 1327



1328

1329

1330
